# Supplementary material
Source: PubMed Central journal article supplement (PMC3393110)
Supplement: NIHMS313117-supplement-2.pdf [file NIHMS313117-supplement-2.pdf]

**Supplementary Table 1. Serum neutralizing activity of selected donors.**

| Donor | presumed clade | Score | Clade A | Clade B |       | Clade C  |         | CRF01_AE |
|-------|----------------|-------|---------|---------|-------|----------|---------|----------|
|       |                |       | 94UG103 | 92BR020 | JRCSE | MGRM-C26 | 93IN905 | 92TH021  |
| #36   | CRF02_AG       | 3.67  | 900     | 900     | ≥2700 | ≥2700    | ≥2700   | ≥2700    |
| #84   | A or D         | 3.00  | 300     | 300     | ≥2700 | 300      | ≥2700   | ≥2700    |
| #17   | A              | 2.83  | 300     | ≥2700   | 900   | ≥2700    | ≥2700   | <100     |
| #39   | C              | 2.83  | 300     | 900     | 900   | ≥2700    | ≥2700   | 100      |

## Supplementary Table 2: Antibody sequence characteristics

### Heavy Chain Sequences

| Name   | Donor | Putative V-gene <sup>a</sup> | Putative J-gene <sup>a</sup> | CDR3 length (amino acids) <sup>b</sup> | CDR3 sequence (amino acids)     | Somatic mutations (nucleotides) <sup>c</sup> | Somatic mutations (amino acids) <sup>c</sup> | Mutation frequency (nucleotides) <sup>c</sup> | Mutation frequency (amino acids) <sup>c</sup> | Insertion/Deletions (number of amino acids/position) |
|--------|-------|------------------------------|------------------------------|----------------------------------------|---------------------------------|----------------------------------------------|----------------------------------------------|-----------------------------------------------|-----------------------------------------------|------------------------------------------------------|
| PGT121 | 17    | IGHV4-59*01                  | IGHJ6*03                     | 24                                     | TLHGRRYIGVAFNEWFTYFYMDV         | 65                                           | 27                                           | 17 %                                          | 21 %                                          |                                                      |
| PGT122 |       |                              |                              |                                        | TKHGRRYIGVVAFKEWFTYFYMDV        | 68                                           | 31                                           | 18 %                                          | 24 %                                          |                                                      |
| PGT123 |       |                              |                              |                                        | ALHGKRIYGIVALGELFTYFYMDV        | 79                                           | 35                                           | 21 %                                          | 27 %                                          |                                                      |
| PGT125 | 36    | IGHV4-39*07                  | IGHJ5*02                     | 19                                     | FDGEVLVYNHWPKPAWVDL             | 78                                           | 36                                           | 20 %                                          | 27 %                                          | +6 in CDR2                                           |
| PGT126 |       |                              |                              |                                        | FDGEVLVYHDWPKPAWVDL             | 67                                           | 30                                           | 17 %                                          | 23 %                                          | +6 in CDR2                                           |
| PGT127 |       |                              |                              |                                        | FGGEVLVYRDWPKPAWVDL             | 58                                           | 30                                           | 15 %                                          | 23 %                                          | +6 in CDR2                                           |
| PGT128 |       |                              |                              |                                        | FGGEVLRDWDWPKPAWVDL             | 75                                           | 36                                           | 19 %                                          | 28 %                                          | +6 in CDR2                                           |
| PGT130 |       |                              |                              |                                        | SGGDILYYYEWQKPHWFSP             | 83                                           | 42                                           | 22 %                                          | 34 %                                          |                                                      |
| PGT131 |       |                              |                              |                                        | SGGDILYYIEWQKPHWFYP             | 84                                           | 41                                           | 23 %                                          | 33 %                                          |                                                      |
| PGT135 | 39    | IGHV4-39*07                  | IGHJ5*02                     | 18                                     | HRHHDVFMVPIAGWFDV               | 67                                           | 37                                           | 17 %                                          | 29 %                                          | +5 in CDR1                                           |
| PGT136 |       |                              |                              |                                        | HKYHDFRVVPVAGWFDP               | 60                                           | 33                                           | 15 %                                          | 25 %                                          | +5 in CDR1/+1 in CDR2                                |
| PGT137 |       |                              |                              |                                        | HKYHDIVMVVPIAGWFDP              | 77                                           | 38                                           | 20 %                                          | 29 %                                          | +5 in CDR1                                           |
| PGT141 | 84    | IGHV1-8*01                   | IGHJ6*02                     | 31/32                                  | GSKHRLRDYVLYDDYGLINYQEWNLYEFLDV | 51                                           | 29                                           | 12 %                                          | 21 %                                          | 0 or +1 in CDR3 <sup>d</sup>                         |
| PGT142 |       |                              |                              |                                        | GSKHRLRDYVLYDDYGLINYQEWNLYEFLDV | 51                                           | 31                                           | 12 %                                          | 23 %                                          | 0 or +1 in CDR3 <sup>d</sup>                         |
| PGT143 |       |                              |                              |                                        | GSKHRLRDYVLYDDYGLINYQEWNLYEFLDV | 51                                           | 29                                           | 12 %                                          | 21 %                                          | 0 or +1 in CDR3 <sup>d</sup>                         |
| PGT144 |       |                              |                              |                                        | GSKHRLRDYVLYDDYGLINYQEWNLYEFLDV | 59                                           | 33                                           | 14 %                                          | 24 %                                          | 0 or +1 in CDR3 <sup>d</sup>                         |
| PGT145 |       |                              |                              |                                        | GSKHRLRDYFLYNEYGPNYEEWGDYLATLDV | 72                                           | 39                                           | 18 %                                          | 29 %                                          | -1 or 0 in CDR3 <sup>d</sup>                         |

### Light Chain Sequences

| Name   | Donor | Putative V-gene <sup>a</sup> | Putative J-gene <sup>a</sup> | CDR3 length (amino acids) <sup>b</sup> | CDR3 sequence (amino acids) | Somatic mutations (nucleotides) <sup>c</sup> | Somatic mutations (amino acids) <sup>c</sup> | Mutation frequency (nucleotides) <sup>c</sup> | Mutation frequency (amino acids) <sup>c</sup> | Insertion/Deletions (number of amino acids/position) |
|--------|-------|------------------------------|------------------------------|----------------------------------------|-----------------------------|----------------------------------------------|----------------------------------------------|-----------------------------------------------|-----------------------------------------------|------------------------------------------------------|
| PGT121 | 17    | IGLV3-21*02                  | IGLJ3*02                     | 12                                     | HIWDSRVPTKVV                | 56                                           | 31                                           | 18 %                                          | 30 %                                          | -7 in FR1/+3 in FR3                                  |
| PGT122 |       |                              |                              |                                        | HIWDSRRPTNWW                | 58                                           | 27                                           | 19 %                                          | 26 %                                          | -7 in FR1/+3 in FR3                                  |
| PGT123 |       |                              |                              |                                        | HIYDARGGTNWW                | 73                                           | 39                                           | 24 %                                          | 38 %                                          | -7 in FR1/+3 in FR3                                  |
| PGT125 | 36    | IGLV2-8*01                   | IGLJ2*01 or IGLJ3*01         | 10                                     | GSLVGNWDVI                  | 46                                           | 23                                           | 15 %                                          | 22 %                                          | -5 in CDR1                                           |
| PGT126 |       |                              |                              |                                        | SSLVGNWDVI                  | 28                                           | 14                                           | 9 %                                           | 13 %                                          | -5 in CDR1                                           |
| PGT127 |       |                              |                              |                                        | SSLVGNWDVI                  | 27                                           | 13                                           | 9 %                                           | 12 %                                          | -5 in CDR1                                           |
| PGT128 |       |                              |                              |                                        | GSLVGNWDVI                  | 27                                           | 14                                           | 9 %                                           | 14 %                                          | -5 in CDR1                                           |
| PGT130 |       |                              |                              |                                        | SSLFGRWDVV                  | 39                                           | 21                                           | 12 %                                          | 19 %                                          |                                                      |
| PGT131 |       |                              |                              |                                        | SSLSGRWDIV                  | 44                                           | 25                                           | 13 %                                          | 23 %                                          |                                                      |
| PGT135 | 39    | IGKV3-15*01                  | IGKJ1*01                     | 9                                      | QQYEEWPRT                   | 51                                           | 29                                           | 16 %                                          | 28 %                                          |                                                      |
| PGT136 |       |                              |                              |                                        | QQYEEWPRT                   | 39                                           | 22                                           | 12 %                                          | 21 %                                          |                                                      |
| PGT137 |       |                              |                              |                                        | QQYEEWPRT                   | 35                                           | 19                                           | 11 %                                          | 18 %                                          |                                                      |
| PGT141 | 84    | IGKV2-28*01 or IGV2D-28*01   | IGKJ1*01                     | 9                                      | MQGLNRPWT                   | 46                                           | 23                                           | 14 %                                          | 21 %                                          |                                                      |
| PGT142 |       |                              |                              |                                        | MQGLNRPWT                   | 46                                           | 23                                           | 14 %                                          | 21 %                                          |                                                      |
| PGT143 |       |                              |                              |                                        | MQGLNRPWT                   | 46                                           | 24                                           | 14 %                                          | 22 %                                          |                                                      |
| PGT144 |       |                              |                              |                                        | MQGLNRPWT                   | 44                                           | 25                                           | 13 %                                          | 23 %                                          |                                                      |
| PGT145 |       |                              |                              |                                        | MQGLHSPWT                   | 52                                           | 26                                           | 16 %                                          | 24 %                                          |                                                      |

a) Putative V- or J-gene of the common germline ancestor of each clonally related antibody cluster.

b) CDR3 lengths according to the Kabat definition.

c) Somatic mutations were counted over the whole variable region as nucleotides or amino acids differing from a putative germline sequence. For each cluster of clonally related antibodies, a germline sequence was composed of the putative V-gene, a consensus junction, the putative J-gene, and a consensus insertion where present. Sequences derived from 3' cloning primers were excluded from the frequency calculations.

d) Either an insertion in PGT141 to 144 or a deletion in PGT145.

e) Insertion of two amino acids in J-region due to mispriming in cloning PCR.

### Supplementary Table 3: Median ICs and percent viruses neutralized

#### A) Median IC<sub>50</sub> (µg/ml) against viruses neutralized with an IC<sub>50</sub> < 50 µg/ml

| Clade | n   | PGT121 | PGT122 | PGT123 | PGT125 | PGT126 | PGT127 | PGT128 | PGT130 | PGT131 | PGT135 | PGT136 | PGT137 | PGT141 | PGT142 | PGT143 | PGT144 | PGT145 | PG9  | VRC01 | PGV04 | b12   | 2G12  | 4E10 |
|-------|-----|--------|--------|--------|--------|--------|--------|--------|--------|--------|--------|--------|--------|--------|--------|--------|--------|--------|------|-------|-------|-------|-------|------|
| A     | 26  | 0.02   | 0.07   | 0.02   | 0.01   | 0.01   | 0.02   | 0.01   | 0.09   | 0.09   | 0.64   | 2.34   | 0.72   | 0.22   | 0.25   | 0.27   | 2.81   | 0.40   | 0.12 | 0.26  | 0.14  | 6.98  | 17.20 | 5.95 |
| B     | 31  | 0.02   | 0.02   | 0.02   | 0.02   | 0.02   | 0.06   | 0.01   | 0.09   | 0.07   | 0.15   | 13.19  | 8.55   | 0.48   | 0.40   | 0.39   | 3.37   | 0.09   | 0.43 | 0.24  | 0.17  | 0.80  | 0.82  | 5.19 |
| C     | 27  | 0.02   | 0.03   | 0.01   | 1.83   | 0.18   | 0.55   | 0.04   | 0.15   | 0.78   | 0.05   | 7.52   | 0.23   | 0.33   | 0.09   | 0.17   | 0.85   | 0.14   | 0.23 | 0.48  | 0.79  | 5.46  | 2.93  | 3.98 |
| D     | 25  | 0.01   | 0.02   | 0.02   | 0.09   | 0.04   | 0.49   | 0.02   | 0.65   | 0.85   | 1.89   | 0.05   | 6.30   | 0.37   | 0.19   | 0.28   | 2.13   | 1.07   | 0.10 | 0.44  | 0.44  | 1.47  | 4.57  | 4.54 |
| F     | 15  | 0.13   | 0.43   | 0.09   | 0.04   | 0.08   | 0.65   | 0.52   | 0.07   | 0.56   | 0.21   | 4.75   | 6.23   | 0.24   | 0.22   | 0.36   | 0.51   | 0.82   | 0.09 | 0.39  | 0.18  | na    | 9.23  | 2.26 |
| G     | 15  | 0.02   | 0.05   | 0.04   | 0.02   | 0.18   | 0.22   | 0.04   | 4.14   | 3.54   | 0.14   | 18.95  | 0.23   | 0.30   | 0.21   | 0.21   | 3.84   | 0.11   | 0.27 | 0.10  | 0.08  | 2.99  | 31.03 | 1.44 |
| AE    | 10  | na     | na     | na     | 0.03   | 1.77   | na     | 0.06   | 0.17   | 0.08   | na     | na     | na     | 0.01   | 0.01   | 0.02   | 0.10   | 0.97   | 0.10 | 0.56  | 1.24  | 21.07 | na    | 0.63 |
| AG    | 10  | 0.49   | 2.75   | 0.61   | 0.01   | 0.03   | 0.04   | 0.67   | 0.04   | 0.18   | 27.37  | 29.11  | 28.30  | 0.50   | 2.16   | 1.11   | 18.62  | 0.16   | 0.56 | 0.12  | 0.10  | 10.40 | 0.95  | 1.42 |
| All   | 162 | 0.03   | 0.05   | 0.03   | 0.04   | 0.04   | 0.06   | 0.02   | 0.16   | 0.52   | 0.17   | 7.81   | 3.46   | 0.35   | 0.21   | 0.31   | 2.06   | 0.29   | 0.23 | 0.32  | 0.20  | 2.82  | 2.38  | 3.41 |

#### B) Percent viruses neutralized with an IC<sub>50</sub> < 50 µg/ml

| Clade | n   | PGT121 | PGT122 | PGT123 | PGT125 | PGT126 | PGT127 | PGT128 | PGT130 | PGT131 | PGT135 | PGT136 | PGT137 | PGT141 | PGT142 | PGT143 | PGT144 | PGT145 | PG9 | VRC01 | PGV04 | b12 | 2G12 | 4E10 |
|-------|-----|--------|--------|--------|--------|--------|--------|--------|--------|--------|--------|--------|--------|--------|--------|--------|--------|--------|-----|-------|-------|-----|------|------|
| A     | 26  | 62     | 58     | 58     | 65     | 54     | 50     | 58     | 50     | 38     | 19     | 4      | 23     | 65     | 69     | 65     | 46     | 81     | 85  | 92    | 100   | 31  | 35   | 96   |
| B     | 31  | 84     | 84     | 81     | 74     | 81     | 81     | 65     | 45     | 39     | 19     | 19     | 52     | 52     | 52     | 39     | 77     | 74     | 100 | 94    | 58    | 71  | 97   |      |
| C     | 27  | 85     | 81     | 85     | 56     | 74     | 52     | 78     | 48     | 41     | 37     | 33     | 33     | 70     | 70     | 70     | 52     | 70     | 67  | 89    | 70    | 26  | 11   | 89   |
| D     | 25  | 48     | 40     | 48     | 40     | 52     | 48     | 60     | 44     | 36     | 24     | 4      | 12     | 28     | 28     | 28     | 16     | 72     | 76  | 84    | 76    | 48  | 24   | 96   |
| F     | 15  | 93     | 80     | 80     | 20     | 33     | 27     | 80     | 33     | 13     | 60     | 13     | 20     | 67     | 67     | 67     | 53     | 100    | 67  | 100   | 93    | 0   | 20   | 93   |
| G     | 15  | 80     | 80     | 80     | 27     | 53     | 40     | 67     | 47     | 40     | 40     | 27     | 33     | 67     | 67     | 67     | 33     | 80     | 80  | 93    | 87    | 13  | 20   | 100  |
| AE    | 10  | 0      | 0      | 0      | 60     | 40     | 0      | 60     | 80     | 60     | 0      | 0      | 0      | 40     | 40     | 40     | 30     | 90     | 100 | 100   | 90    | 40  | 0    | 100  |
| AG    | 10  | 70     | 60     | 60     | 30     | 50     | 40     | 90     | 50     | 40     | 20     | 10     | 10     | 50     | 60     | 50     | 20     | 70     | 80  | 90    | 100   | 30  | 50   | 100  |
| All   | 162 | 70     | 65     | 67     | 52     | 60     | 50     | 72     | 52     | 40     | 33     | 16     | 22     | 56     | 57     | 56     | 38     | 78     | 77  | 93    | 88    | 34  | 32   | 96   |

#### C) Median IC<sub>50</sub> (µg/ml) against all viruses

| Clade | n   | PGT121 | PGT122 | PGT123 | PGT125 | PGT126 | PGT127 | PGT128 | PGT130 | PGT131 | PGT135 | PGT136 | PGT137 | PGT141 | PGT142 | PGT143 | PGT144 | PGT145 | PG9  | VRC01 | PGV04 | b12   | 2G12  | 4E10 |
|-------|-----|--------|--------|--------|--------|--------|--------|--------|--------|--------|--------|--------|--------|--------|--------|--------|--------|--------|------|-------|-------|-------|-------|------|
| A     | 26  | 0.87   | 3.09   | 0.69   | 0.16   | 2.02   | 21.71  | 0.35   | 41.39  | 50.00  | 50.00  | 50.00  | 50.00  | 1.92   | 2.21   | 6.34   | 50.00  | 1.16   | 0.21 | 0.28  | 0.14  | 50.00 | 50.00 | 6.19 |
| B     | 31  | 0.03   | 0.05   | 0.04   | 0.06   | 0.04   | 0.12   | 0.02   | 5.17   | 50.00  | 50.00  | 50.00  | 50.00  | 33.21  | 15.15  | 25.89  | 50.00  | 0.34   | 2.08 | 0.24  | 0.25  | 4.17  | 1.90  | 5.76 |
| C     | 27  | 0.02   | 0.04   | 0.02   | 37.48  | 0.79   | 19.19  | 0.08   | 50.00  | 50.00  | 50.00  | 50.00  | 50.00  | 3.28   | 0.79   | 0.80   | 48.89  | 0.49   | 0.57 | 0.71  | 2.76  | 50.00 | 50.00 | 3.98 |
| D     | 25  | 50.00  | 50.00  | 50.00  | 50.00  | 43.14  | 50.00  | 0.14   | 50.00  | 50.00  | 50.00  | 50.00  | 50.00  | 50.00  | 50.00  | 50.00  | 10.00  | 10.00  | 1.91 | 0.58  | 1.01  | 50.00 | 50.00 | 5.30 |
| F     | 15  | 0.17   | 1.29   | 0.31   | 50.00  | 50.00  | 50.00  | 1.21   | 50.00  | 50.00  | 7.79   | 50.00  | 50.00  | 1.15   | 0.82   | 0.98   | 20.56  | 0.82   | 0.58 | 0.39  | 0.18  | 50.00 | 50.00 | 2.26 |
| G     | 15  | 0.06   | 0.51   | 0.18   | 50.00  | 48.85  | 50.00  | 0.32   | 50.00  | 50.00  | 50.00  | 50.00  | 50.00  | 4.69   | 5.95   | 4.77   | 50.00  | 0.21   | 0.51 | 0.12  | 0.13  | 50.00 | 50.00 | 1.44 |
| AE    | 10  | 50.00  | 50.00  | 50.00  | 1.61   | 50.00  | 50.00  | 0.31   | 0.58   | 2.60   | 50.00  | 50.00  | 50.00  | 50.00  | 50.00  | 50.00  | 50.00  | 1.17   | 0.10 | 0.56  | 1.26  | 50.00 | 50.00 | 0.63 |
| AG    | 10  | 0.60   | 38.45  | 8.04   | 50.00  | 11.07  | 50.00  | 1.62   | 21.75  | 50.00  | 50.00  | 50.00  | 50.00  | 31.02  | 16.43  | 41.24  | 50.00  | 1.27   | 3.47 | 0.16  | 0.10  | 50.00 | 14.00 | 1.42 |
| All   | 162 | 0.31   | 2.02   | 0.35   | 34.97  | 1.08   | 42.83  | 0.10   | 22.98  | 50.00  | 50.00  | 50.00  | 50.00  | 16.01  | 9.46   | 13.76  | 50.00  | 0.86   | 0.62 | 0.34  | 0.30  | 50.00 | 50.00 | 3.50 |

#### D) Median IC<sub>90</sub> (µg/ml) against viruses neutralized with an IC<sub>90</sub> < 50 µg/ml

| Clade | n   | PGT121 | PGT122 | PGT123 | PGT125 | PGT126 | PGT127 | PGT128 | PGT130 | PGT131 | PGT135 | PGT136 | PGT137 | PGT141 | PGT142 | PGT143 | PGT144 | PGT145 | PG9  | VRC01 | PGV04 | b12   | 2G12  | 4E10  |
|-------|-----|--------|--------|--------|--------|--------|--------|--------|--------|--------|--------|--------|--------|--------|--------|--------|--------|--------|------|-------|-------|-------|-------|-------|
| A     | 26  | 0.20   | 0.33   | 0.18   | 0.07   | 0.08   | 0.16   | 0.04   | 4.99   | 0.73   | 1.01   | na     | 2.54   | 2.88   | 2.37   | 1.57   | 4.51   | 4.30   | 2.24 | 2.20  | 1.45  | 48.45 | 17.77 | 40.61 |
| B     | 31  | 0.11   | 0.15   | 0.14   | 0.13   | 0.17   | 0.36   | 0.07   | 0.77   | 0.50   | 2.87   | 2.09   | na     | 4.62   | 9.52   | 2.84   | 7.08   | 0.54   | 2.60 | 2.05  | 1.66  | 5.96  | 4.92  | 30.31 |
| C     | 27  | 0.12   | 0.17   | 0.08   | 0.18   | 0.98   | 7.99   | 0.17   | 2.67   | 15.80  | 0.28   | 0.28   | 1.32   | 3.83   | 1.69   | 2.02   | 12.43  | 1.76   | 7.68 | 6.18  | 3.83  | 27.42 | 28.67 | 21.21 |
| D     | 25  | 0.12   | 0.11   | 0.13   | 0.87   | 0.33   | 0.18   | 0.12   | 3.18   | 2.67   | 1.13   | 2.10   | 16.10  | 25.10  | 9.75   | 8.36   | 19.06  | 5.27   | 0.80 | 5.72  | 3.23  | 12.68 | 8.77  | 23.46 |
| F     | 15  | 1.17   | 5.53   | 0.74   | 0.37   | 1.00   | 0.86   | 1.17   | 4.84   | 1.92   | 1.26   | na     | 21.09  | 4.55   | 3.45   | 6.08   | 7.79   | 9.74   | 0.52 | 2.72  | 2.34  | na    | 21.50 | 7.83  |
| G     | 15  | 0.22   | 0.65   | 0.19   | 0.05   | 0.17   | 0.67   | 0.12   | 28.06  | na     | 1.01   | 7.54   | 1.45   | 1.58   | 1.99   | 1.85   | 7.57   | 2.18   | 6.35 | 1.44  | 1.74  | 22.81 | na    | 16.57 |
| AE    | 10  | na     | na     | na     | 0.22   | 19.58  | na     | 1.47   | 0.08   | 0.21   | na     | na     | na     | 0.03   | 0.03   | 0.05   | 3.41   | 11.09  | 1.02 | 4.08  | 8.18  | 12.68 | na    | 12.96 |
| AG    | 10  | 0.56   | 0.97   | 2.27   | 0.05   | 0.08   | 0.24   | 0.13   | 0.07   | 0.16   | na     | na     | na     | 3.66   | 5.15   | 4.97   | na     | 0.87   | 0.36 | 1.17  | 1.97  | 16.98 | 7.04  | 15.36 |
| All   | 162 | 0.13   | 0.26   | 0.16   | 0.16   | 0.17   | 0.46   | 0.12   | 1.68   | 0.54   | 1.13   | 2.09   | 2.10   | 3.89   | 3.75   | 2.60   | 8.37   | 2.10   | 1.22 | 2.79  | 2.00  | 16.01 | 6.96  | 22.37 |

#### E) Percent viruses neutralized with an IC<sub>90</sub> < 50 µg/ml

| Clade | n   | PGT121 | PGT122 | PGT123 | PGT125 | PGT126 | PGT127 | PGT128 | PGT130 | PGT131 | PGT135 | PGT136 | PGT137 | PGT141 | PGT142 | PGT143 | PGT144 | PGT145 | PG9 | VRC01 | PGV04 | b12 | 2G12 | 4E10 |
|-------|-----|--------|--------|--------|--------|--------|--------|--------|--------|--------|--------|--------|--------|--------|--------|--------|--------|--------|-----|-------|-------|-----|------|------|
| A     | 26  | 50     | 50     | 50     | 54     | 50     | 46     | 50     | 31     | 23     | 4      | 0      | 12     | 38     | 46     | 35     | 4      | 46     | 69  | 88    | 88    | 4   | 4    | 23   |
| B     | 31  | 81     | 77     | 77     | 58     | 74     | 65     | 77     | 42     | 29     | 23     | 3      | 0      | 32     | 39     | 29     | 13     | 61     | 29  | 100   | 84    | 45  | 52   | 16   |
| C     | 27  | 67     | 59     | 63     | 26     | 48     | 38     | 67     | 26     | 21     | 33     | 13     | 21     | 48     | 58     | 50     | 29     | 58     | 48  | 81    | 48    | 17  | 4    | 42   |
| D     | 25  | 36     | 32     | 32     | 28     | 36     | 28     | 48     | 16     | 8      | 8      | 4      | 4      | 20     | 20     | 16     | 8      | 36     | 40  | 72    | 56    | 28  | 12   | 20   |
| F     | 15  | 60     | 73     | 53     | 20     | 27     | 13     | 53     | 20     | 7      | 33     | 0      | 7      | 47     | 53     | 47     | 27     | 67     | 40  | 100   | 93    | 0   | 7    | 40   |
| G     | 15  | 60     | 60     | 47     | 7      | 20     | 20     | 47     | 7      | 0      | 20     | 7      | 13     | 33     | 47     | 40     | 7      | 67     | 40  | 93    | 87    | 13  | 0    | 53   |
| AE    | 10  | 0      | 0      | 0      | 40     | 20     | 0      | 50     | 50     | 40     | 0      | 0      | 0      | 30     | 30     | 30     | 20     | 60     | 70  | 100   | 80    | 10  | 0    | 70   |
| AG    | 10  | 30     | 30     | 40     | 30     | 30     | 30     | 50     | 30     | 20     | 0      | 0      | 0      | 20     | 30     | 20     | 0      | 50     | 40  | 90    | 100   | 10  | 30   | 60   |
| All   | 162 | 55     | 54     | 52     | 37     | 45     | 36     | 57     | 28     | 19     | 17     | 5      |        |        |        |        |        |        |     |       |       |     |      |      |

Supplementary Table 4. Neutralizing activity of PGT mAbs against a cross-clade 162-pseudovirus panel.

| Isolate     | Subtype | IC <sub>50</sub> (µg/mL) |         |         |         |         |         |         |         |         |         |         |         |         |         |         |         |         |        | IC <sub>50</sub> (1/dil'n) |        |        |        |        |        |       |
|-------------|---------|--------------------------|---------|---------|---------|---------|---------|---------|---------|---------|---------|---------|---------|---------|---------|---------|---------|---------|--------|----------------------------|--------|--------|--------|--------|--------|-------|
|             |         | PGT-121                  | PGT-122 | PGT-123 | PGT-125 | PGT-126 | PGT-127 | PGT-128 | PGT-130 | PGT-131 | PGT-135 | PGT-136 | PGT-137 | PGT-141 | PGT-142 | PGT-143 | PGT-144 | PGT-145 | VRC01  | PGV04                      | PG9    | #17    | #84    | #36    | #39    |       |
| 92RW008     | A       | 0.003                    | 0.003   | 0.003   | 0.004   | 0.008   | 0.012   | 0.003   | 0.089   | 1.011   | 1.417   | >50     | 0.148   | 0.579   | 0.447   | 0.385   | >50     | 0.400   | 0.037  | 0.014                      | 0.006  | 6500.7 | 9301.5 | 2084.1 | 644.0  |       |
| 92RW009     |         | 1.739                    | 42.406  | 15.680  | 0.144   | >50     | >50     | 0.812   | 1.274   | 3.115   | >50     | >50     | >50     | 0.022   | 0.006   | 0.010   | 0.893   | 0.026   | 0.187  | 0.108                      | 0.050  | 463.6  | 1247.6 | 241.0  | <100   |       |
| 92RW020     |         | 0.004                    | 0.009   | 0.002   | 0.004   | 0.006   | 0.010   | 0.005   | 0.039   | 0.168   | 0.067   | 2.335   | 0.005   | >50     | 31.523  | >50     | >50     | 0.997   | 0.130  | 0.055                      | 0.141  | 5671.1 | 428.3  | 2617.1 | 2730.0 |       |
| 92RW021     |         | 0.009                    | 0.021   | 0.005   | 0.005   | 0.006   | 0.011   | 0.005   | 0.004   | 0.012   | >50     | >50     | 3.516   | >50     | >50     | >50     | >50     | 1.620   | 0.066  | 0.038                      | 0.027  | 2343.6 | 1092.2 | 4204.8 | 428.0  |       |
| 92RW024     |         | >50                      | >50     | >50     | 35.530  | 41.995  | >50     | >50     | >50     | >50     | >50     | >50     | >50     | 0.175   | 0.069   | 0.122   | 16.346  | 0.069   | 0.327  | 0.310                      | 0.258  | <100   | 507.7  | 149.7  | 178.0  |       |
| 92RW026     |         | 0.014                    | 0.036   | 0.012   | 0.007   | 0.008   | 0.024   | 0.010   | 0.037   | 0.041   | 0.068   | >50     | 0.092   | 1.781   | 1.780   | 5.364   | 32.691  | 1.453   | N/A    | 0.140                      | 0.164  | 1561.0 | 717.3  | 2183.4 | 1046.0 |       |
| 92UG031     |         | >50                      | >50     | >50     | >50     | >50     | >50     | >50     | >50     | >50     | >50     | >50     | >50     | 0.093   | 0.050   | 0.095   | 2.175   | 3.220   | 0.469  | 4.463                      | 3.605  | <100   | 282.5  | 422.2  | 459.0  |       |
| 92UG037     |         | 0.031                    | 0.068   | 0.023   | 0.005   | 0.011   | 0.014   | 0.006   | 0.061   | 0.048   | 3.672   | >50     | >50     | 1.276   | 0.557   | 0.854   | 8.241   | 3.148   | 0.245  | 0.145                      | 0.014  | 1120.4 | 501.8  | 1431.8 | 410.0  |       |
| 93RW029     |         | >50                      | >50     | >50     | >50     | >50     | >50     | >50     | 34.264  | >50     | >50     | >50     | >50     | 0.019   | 0.014   | 0.053   | 4.391   | >50     | 1.570  | 0.540                      | 0.690  | <100   | 589.2  | <100   | 270.0  |       |
| 93UG077     |         | 0.019                    | 0.084   | 0.028   | 0.012   | 0.020   | 0.055   | 0.014   | 21.392  | >50     | >50     | >50     | >50     | >50     | >50     | >50     | >50     | >50     | 0.097  | 0.083                      | >50    | 1082.8 | 326.4  | 707.2  | 436.0  |       |
| 94UG103     |         | 2.518                    | 2.041   | 0.678   | 0.008   | 0.008   | 0.017   | 0.011   | 1.402   | 1.097   | >50     | >50     | >50     | >50     | >50     | >50     | >50     | 0.331   | 0.285  | 0.202                      | 0.340  | 193.4  | 208.3  | 1138.4 | 568.0  |       |
| MGRM-A-001  |         | >50                      | >50     | >50     | 12.392  | >50     | >50     | >50     | >50     | >50     | >50     | >50     | >50     | 0.209   | 0.169   | 0.274   | 1.111   | 0.062   | >50    | 6.781                      | >50    | <100   | 231.7  | <100   | 149.0  |       |
| MGRM-A-002  |         | 0.013                    | 0.017   | 0.011   | 0.013   | 0.015   | 9.422   | 0.149   | 0.010   | >50     | >50     | >50     | >50     | 0.217   | 0.007   | 0.016   | 0.085   | 0.019   | N/A    | 0.093                      | 0.020  | 839.3  | 533.0  | 2782.2 | 264.0  |       |
| MGRM-A-003  |         | 0.435                    | 3.794   | 0.495   | >50     | >50     | >50     | >50     | >50     | >50     | >50     | >50     | >50     | 7.961   | 9.239   | 11.154  | >50     | 3.315   | 0.422  | 0.128                      | 1.942  | <100   | 612.2  | <100   | 375.0  |       |
| MGRM-A-004  |         | >50                      | >50     | >50     | >50     | >50     | >50     | >50     | >50     | >50     | >50     | >50     | >50     | 0.007   | 0.002   | 0.007   | 0.855   | 0.068   | 1.064  | 0.175                      | 0.020  | <100   | 4567.2 | <100   | 319.0  |       |
| MGRM-A-005  |         | >50                      | >50     | >50     | >50     | >50     | >50     | >50     | >50     | >50     | >50     | >50     | >50     | 11.112  | 9.695   | 7.483   | 18.590  | 0.128   | 0.095  | 0.134                      | 0.750  | <100   | 151.2  | <100   | 282.0  |       |
| MGRM-A-006  |         | 0.396                    | >50     | >50     | >50     | >50     | >50     | >50     | >50     | >50     | >50     | >50     | >50     | >50     | >50     | >50     | >50     | >50     | 0.521  | 0.244                      | >50    | 260.6  | 646.5  | 120.0  | 564.0  |       |
| MGRM-A-007  |         | >50                      | >50     | >50     | >50     | >50     | >50     | >50     | >50     | >50     | >50     | >50     | >50     | >50     | >50     | >50     | >50     | >50     | 12.584 | 7.213                      | 1.061  | <100   | <100   | <100   | 556.0  |       |
| MGRM-A-008  |         | >50                      | >50     | >50     | >50     | >50     | >50     | >50     | >50     | >50     | >50     | >50     | >50     | >50     | >50     | >50     | >50     | >50     | 0.303  | 0.555                      | >50    | <100   | <100   | <100   | 196.0  |       |
| MGRM-A-009  |         | 0.006                    | 0.012   | 0.004   | 0.009   | 0.004   | 0.013   | 0.005   | 0.308   | 0.035   | >50     | >50     | >50     | 0.029   | 0.058   | 0.050   | 2.834   | 0.235   | 0.118  | 0.033                      | 0.023  | 4535.8 | 2228.7 | 1611.4 | 286.0  |       |
| MGRM-A-010  | 2.444   | 2.509                    | 0.705   | 0.004   | 0.002   | 0.017   | 0.005   | 0.005   | 0.010   | >50     | >50     | >50     | 0.022   | 0.015   | 0.019   | 2.791   | 0.028   | 0.325   | 0.205  | 0.022                      | 271.3  | 1704.2 | 2779.2 | 279.0  |        |       |
| MGRM-A-011  | >50     | >50                      | >50     | >50     | >50     | >50     | >50     | >50     | >50     | >50     | >50     | >50     | >50     | >50     | >50     | >50     | 0.484   | 0.273   | 0.090  | 0.033                      | <100   | 242.3  | <100   | 169.0  |        |       |
| MGRM-A-012  | 0.092   | 0.257                    | 0.192   | 0.177   | 0.097   | 0.105   | 0.025   | >50     | >50     | >50     | >50     | >50     | >50     | >50     | >50     | >50     | 0.230   | >50     | 0.225  | 19.294                     | 229.9  | <100   | 270.6  | 215.0  |        |       |
| MGRM-A-013  | 0.387   | 2.474                    | 0.565   | 0.014   | 0.006   | 0.029   | 0.008   | >50     | >50     | >50     | >50     | 49.188  | 9.856   | 3.725   | 9.241   | >50     | 1.761   | 0.152   | 0.086  | 0.122                      | 892.0  | 162.8  | 835.9  | 776.0  |        |       |
| MGRM-A-014  | 0.003   | 0.007                    | 0.003   | 13.913  | 0.010   | 0.240   | 0.007   | 0.161   | 15.444  | 0.636   | >50     | 18.576  | 0.628   | 0.367   | 1.071   | >50     | 1.357   | 0.135   | 0.172  | 1.248                      | 7222.6 | 412.6  | 705.2  | 681.0  |        |       |
| VLGCA1      | >50     | >50                      | >50     | 0.078   | >50     | >50     | 0.838   | >50     | >50     | >50     | >50     | >50     | 2.067   | 2.754   | 17.389  | >50     | 8.009   | 0.163   | 0.024  | 0.069                      | <100   | 311.2  | 203.2  | <100   |        |       |
| 94KE105     | AC      | 0.029                    | 0.056   | 0.024   | 0.004   | 0.006   | 0.023   | 0.007   | 0.004   | 0.013   | 0.063   | >50     | 18.548  | 0.204   | 0.190   | 0.368   | 0.290   | 1.317   | 0.499  | 2.981                      | 37.875 | 955.0  | 1035.2 | 4540.1 | 1633.0 |       |
| 92TH021     |         | >50                      | >50     | >50     | 0.006   | 0.197   | >50     | 0.010   | 0.009   | 0.014   | >50     | >50     | >50     | 0.001   | 0.002   | 0.003   | 0.052   | 0.013   | 0.616  | 1.289                      | 0.059  | <100   | 5298.1 | 3301.2 | 212.0  |       |
| CMU02       |         | >50                      | >50     | >50     | >50     | >50     | >50     | >50     | >50     | >50     | >50     | >50     | >50     | >50     | >50     | >50     | >50     | 1.425   | 0.515  | 1.238                      | >50    | <100   | 101.3  | <100   | 312.0  |       |
| MGRM-AE-001 |         | >50                      | >50     | >50     | 2.948   | 9.684   | >50     | 0.069   | 1.005   | 4.805   | >50     | >50     | >50     | >50     | >50     | >50     | >50     | 20.916  | 0.167  | 0.063                      | 20.586 | <100   | <100   | 222.6  | 223.0  |       |
| MGRM-AE-002 |         | >50                      | >50     | >50     | >50     | >50     | >50     | 0.522   | 1.534   | >50     | >50     | >50     | >50     | >50     | >50     | >50     | >50     | 1.868   | 0.217  | 0.569                      | 0.040  | <100   | 169.1  | 254.0  | 249.0  |       |
| MGRM-AE-003 |         | >50                      | >50     | >50     | 0.092   | >50     | >50     | 0.180   | 0.337   | 1.407   | >50     | >50     | >50     | >50     | >50     | >50     | >50     | 0.552   | 0.685  | 6.401                      | 0.044  | <100   | 150.0  | <100   | 181.0  |       |
| MGRM-AE-004 |         | >50                      | >50     | >50     | >50     | >50     | >50     | >50     | 2.429   | >50     | >50     | >50     | >50     | 0.001   | 0.001   | 0.002   | 0.104   | 0.006   | 0.187  | 0.183                      | 0.009  | <100   | 6926.5 | 131.7  | 123.0  |       |
| MGRM-AE-005 |         | >50                      | >50     | >50     | 0.010   | 0.324   | >50     | 0.032   | 0.006   | 0.017   | >50     | >50     | >50     | >50     | >50     | >50     | >50     | 0.967   | 0.029  | 0.051                      | 0.282  | <100   | 208.2  | 2772.2 | 265.0  |       |
| MGRM-AE-006 |         | >50                      | >50     | >50     | 0.009   | 17.268  | >50     | 0.044   | 0.009   | 0.026   | >50     | >50     | >50     | >50     | >50     | >50     | >50     | >50     | 4.648  | >50                        | 0.063  | <100   | 117.5  | 1352.7 | 194.0  |       |
| MGRM-AE-007 |         | >50                      | >50     | >50     | 0.876   | >50     | >50     | >50     | 0.083   | 0.226   | >50     | >50     | >50     | 33.133  | 6.697   | 13.558  | >50     | 0.181   | 0.835  | 5.753                      | 0.180  | <100   | 270.9  | 444.5  | 184.0  |       |
| MGRM-AE-008 |         | >50                      | >50     | >50     | >50     | >50     | >50     | >50     | >50     | >50     | >50     | >50     | >50     | 0.101   | 0.080   | 0.135   | 3.553   | 1.464   | 1.715  | 1.513                      | 31.482 | <100   | 611.7  | <100   | 341.0  |       |
| MGRM-AG-001 |         | 2.096                    | 14.472  | 2.509   | >50     | >50     | >50     | 4.730   | >50     | >50     | >50     | >50     | >50     | 18.030  | 12.423  | 18.933  | >50     | 0.164   | 0.228  | 0.218                      | 17.125 | 174.8  | 292.1  | 302.2  | 499.0  |       |
| MGRM-AG-002 |         | >50                      | >50     | >50     | >50     | >50     | >50     | 4.987   | >50     | >50     | >50     | >50     | >50     | 0.049   | 0.044   | 0.076   | 7.780   | 0.056   | 0.950  | 0.879                      | 0.076  | 125.5  | 748.0  | 139.4  | 206.0  |       |
| MGRM-AG-003 |         | 0.465                    | 43.663  | >50     | >50     | >50     | >50     | 34.787  | 0.041   | 2.917   | >50     | >50     | >50     | >50     | >50     | >50     | >50     | >50     | 0.043  | 0.058                      | >50    | <100   | 505.3  | <100   | 121.0  |       |
| MGRM-AG-005 |         | 0.649                    | 33.861  | 0.149   | >50     | 1.207   | 11.591  | 0.037   | 0.540   | 1.041   | >50     | >50     | >50     | 0.497   | 0.383   | 1.114   | >50     | 0.045   | 0.091  | 0.027                      | >50    | 517.3  | 775.6  | 865.9  | 708.0  |       |
| MGRM-AG-006 |         | 0.014                    | 0.028   | 0.014   | 0.008   | 0.010   | 0.021   | 0.009   | 0.009   | 0.019   | 17.890  | 29.108  | 28.298  | >50     | >50     | >50     | >50     | 6.603   | 0.344  | 1.230                      | >50    | 1105.3 | 321.1  | 4106.0 | 536.0  |       |
| MGRM-AG-008 |         | 0.494                    | >50     | 19.162  | >50     | >50     | >50     | 0.668   | >50     | >50     | >50     | >50     | >50     | 19.242  | 12.125  | 34.009  | >50     | 0.244   | 0.124  | 2.484                      | 0.013  | 1125.1 | 827.8  | <100   | 692.0  |       |
| MGRM-AG-009 |         | 0.080                    | 0.128   | 0.073   | 0.026   | 0.030   | 0.059   | 0.021   | 9.461   | >50     | >50     | >50     | >50     | >50     | >50     | >50     | >50     | >50     | 0.148  | >50                        | 0.525  | >50    | 525.2  | 101.4  | 220.2  | 128.0 |
| MGRM-AG-011 |         | >50                      | >50     | >50     | >50     | 2.451   | >50     | 3.931   | >50     | >50     | >50     | >50     | >50     | 0.118   | 0.081   | 0.156   | 44.563  | 0.003   | 0.084  | 0.071                      | 0.007  | <100   | 2785.8 | 228.1  | 274.0  |       |
| MGRM-AG-012 |         | >50                      | >50     | >50     | >50     | >50     | >50     | >50     | >50     | >50     | 41.885  | >50     | >50     | >50     | >50     | >50     | >50     | >50     | 0.031  | 0.040                      | 22.845 | 104.9  | <100   | 136.6  | 235.0  |       |
| MGRM-AG-013 | 0.557   | 0.521                    | 3.371   | 0.004   | 0.008   | 0.018   | 0.004   | 0.010   | 0.030   | >50     | >50     | >50     | >50     | 21.719  | >50     | >50     | 14.387  | 0.197   | 0.030  | 0.259                      | 321.2  | 319.1  | 2055.6 | 303.   |        |       |

| Isolate            | Subtype | IC <sub>50</sub> (µg/mL) |         |         |         |         |         |         |         |         |         |         |         |         |         |         |         |         |        | IC <sub>50</sub> (1/dil'n) |        |         |        |        |       |
|--------------------|---------|--------------------------|---------|---------|---------|---------|---------|---------|---------|---------|---------|---------|---------|---------|---------|---------|---------|---------|--------|----------------------------|--------|---------|--------|--------|-------|
|                    |         | PGT-121                  | PGT-122 | PGT-123 | PGT-125 | PGT-126 | PGT-127 | PGT-128 | PGT-130 | PGT-131 | PGT-135 | PGT-136 | PGT-137 | PGT-141 | PGT-142 | PGT-143 | PGT-144 | PGT-145 | VRC01  | PGV04                      | PG9    | #17     | #84    | #36    | #39   |
| 6535.3             | B       | 0.005                    | 0.006   | 0.004   | 0.010   | 0.022   | 0.020   | 0.011   | 0.031   | 0.056   | >50     | >50     | >50     | >50     | >50     | >50     | >50     | 1.755   | 0.757  | 1.053                      | 3712.0 | 477.8   | 848.0  | 387.0  |       |
| 92BR020            |         | 0.014                    | 0.021   | 0.008   | 0.016   | 0.015   | 0.059   | 0.009   | 1.395   | 6.157   | 0.073   | 8.608   | 7.811   | 20.299  | 15.146  | 25.892  | 44.036  | 1.051   | 0.290  | 0.250                      | >50    | 1623.7  | 262.2  | 741.3  | 421.0 |
| 93TH305            |         | 0.007                    | 0.013   | 0.008   | 0.008   | 0.013   | 0.017   | 0.006   | 0.021   | 0.016   | >50     | 20.214  | >50     | >50     | 5.856   | 17.270  | >50     | 0.032   | 0.243  | 0.255                      | 8.124  | 3675.2  | 828.0  | 1520.7 | 306.0 |
| APV_13             |         | 0.251                    | 0.778   | 0.138   | 0.007   | 0.012   | 0.026   | 0.008   | 0.052   | 0.189   | 0.716   | >50     | >50     | >50     | >50     | >50     | 0.337   | 0.657   | 1.227  | >50                        | 177.8  | 211.6   | 1460.1 | 173.0  |       |
| APV_17             |         | 0.066                    | 0.250   | 0.114   | 8.063   | 0.353   | 10.378  | 0.016   | 10.661  | >50     | >50     | >50     | >50     | 0.590   | 0.628   | 1.108   | 10.298  | 0.488   | 0.477  | 0.309                      | 34.778 | 470.0   | 161.5  | 279.4  | 482.0 |
| APV_6              |         | 0.018                    | 0.019   | 0.023   | 0.021   | 0.007   | 0.040   | 0.007   | >50     | >50     | >50     | >50     | >50     | 14.216  | 4.725   | 13.968  | >50     | 0.104   | 1.812  | 24.187                     | 0.181  | 914.6   | 253.2  | 512.9  | 706.0 |
| CAAN.A2            |         | 0.011                    | 0.011   | 0.015   | 5.467   | 0.273   | 0.371   | 1.482   | >50     | >50     | 5.154   | >50     | >50     | >50     | >50     | >50     | 7.085   | 0.722   | 2.262  | 19.267                     | 1743.1 | 173.1   | 148.8  | 222.0  |       |
| JRFL               |         | 0.021                    | 0.026   | 0.014   | 0.009   | 0.014   | 0.029   | 0.007   | 0.046   | 0.454   | >50     | >50     | >50     | >50     | >50     | >50     | >50     | 30.401  | 0.034  | 0.032                      | >50    | 1291.5  | 348.5  | 858.2  | 471.0 |
| MGRM-Chronic-B-001 |         | 0.102                    | 0.138   | 0.150   | >50     | >50     | >50     | >50     | >50     | >50     | >50     | >50     | >50     | >50     | >50     | >50     | >50     | 3.223   | 0.066  | 0.048                      | >50    | 330.1   | 160.6  | 246.0  | 390.0 |
| MGRM-Chronic-B-002 |         | 0.386                    | 1.801   | 0.234   | 0.064   | 0.078   | 0.279   | 0.036   | >50     | >50     | >50     | >50     | >50     | >50     | >50     | >50     | >50     | 3.672   | 0.117  | 0.142                      | 3.439  | 200.1   | <100   | 344.4  | 320.0 |
| MGRM-Chronic-B-003 |         | 0.011                    | 0.008   | 0.008   | 0.157   | 0.041   | 0.120   | 0.007   | >50     | >50     | >50     | >50     | >50     | 0.400   | 0.484   | 0.854   | 7.408   | 0.045   | 0.100  | 0.258                      | >50    | 3664.9  | 307.2  | 370.4  | 103.0 |
| MGRM-Chronic-B-004 |         | 0.009                    | 0.008   | 0.008   | 0.007   | 0.010   | 0.018   | 0.009   | 0.010   | 0.040   | >50     | >50     | >50     | 0.586   | 0.172   | 0.395   | 9.415   | 0.023   | 0.055  | 0.047                      | 0.533  | 1874.9  | 796.5  | 1463.1 | 304.0 |
| MGRM-Chronic-B-008 |         | 0.007                    | 0.017   | 0.010   | >50     | 5.890   | 21.515  | 0.143   | 5.183   | >50     | >50     | >50     | >50     | >50     | >50     | >50     | >50     | 1.903   | 0.155  | 0.166                      | 8.784  | 2805.1  | 251.8  | 260.2  | 685.0 |
| MGRM-Chronic-B-010 |         | 0.014                    | 0.018   | 0.009   | 0.006   | 0.005   | 0.019   | 0.004   | 0.006   | 0.016   | >50     | >50     | >50     | >50     | >50     | >50     | >50     | >50     | 0.156  | 0.744                      | 0.004  | 1145.5  | 443.0  | 3234.8 | 383.0 |
| MGRM-Chronic-B-011 |         | >50                      | >50     | >50     | 3.228   | 0.108   | 0.297   | 0.020   | 0.153   | 6.468   | >50     | >50     | >50     | 2.241   | 0.994   | 1.557   | 5.637   | 0.206   | 0.587  | 0.497                      | >50    | 130.8   | 458.4  | 1030.2 | 759.0 |
| MGRM-Chronic-B-012 |         | 0.036                    | 0.066   | 0.227   | 0.036   | 0.027   | 0.075   | 0.026   | 0.373   | 15.708  | 0.166   | 43.142  | >50     | >50     | >50     | >50     | 9.062   | 1.033   | >50    | 0.200                      | 903.5  | 480.6   | 634.2  | 664.0  |       |
| MGRM-Chronic-B-017 |         | >50                      | 5.664   | >50     | >50     | >50     | >50     | >50     | >50     | >50     | >50     | >50     | >50     | 0.147   | 0.076   | 0.145   | 0.712   | 0.054   | 0.141  | 0.129                      | 0.688  | 132.7   | 317.6  | <100   | 383.0 |
| MGRM-Chronic-B-018 |         | >50                      | >50     | >50     | >50     | 0.052   | 1.896   | 0.020   | 31.873  | >50     | >50     | >50     | >50     | 0.572   | 0.323   | 0.377   | 2.397   | 0.013   | 0.328  | 0.164                      | 0.216  | <100    | 612.7  | 289.3  | 375.0 |
| MGRM-Chronic-B-020 |         | 0.004                    | 0.005   | 0.005   | 0.087   | 0.021   | 0.050   | 0.007   | 0.014   | 0.053   | 0.057   | >50     | 32.851  | >50     | >50     | >50     | >50     | >50     | 0.424  | 1.262                      | >50    | 4132.2  | 390.1  | 858.8  | 305.0 |
| MGRM-Chronic-B-023 |         | 0.005                    | 0.010   | 0.055   | >50     | >50     | >50     | >50     | >50     | >50     | 0.329   | >50     | >50     | 0.318   | 0.486   | 0.236   | >50     | 0.009   | 0.275  | 0.139                      | 0.027  | 2216.5  | 950.0  | 196.7  | 523.0 |
| MGRM-Chronic-B-024 |         | 0.195                    | 2.308   | >50     | >50     | >50     | >50     | >50     | 5.776   | >50     | >50     | >50     | >50     | 0.011   | 0.005   | 0.010   | 0.040   | 0.018   | 0.377  | 2.517                      | 0.222  | 157.1   | 1060.2 | 104.1  | 110.0 |
| PVO.4              |         | 0.137                    | 0.689   | 0.105   | 0.042   | 0.017   | 0.164   | 0.005   | 5.171   | >50     | >50     | >50     | >50     | 0.113   | 0.066   | 0.162   | 0.535   | 0.299   | 0.454  | 24.752                     | 212.9  | 239.4   | 420.8  | 123.0  |       |
| QH0692.42          |         | 0.823                    | 0.493   | 0.158   | 0.048   | 0.048   | 0.129   | 0.029   | >50     | >50     | >50     | >50     | >50     | >50     | >50     | >50     | >50     | >50     | 1.194  | 1.904                      | >50    | 175.1   | <100   | 227.6  | 359.0 |
| SC422661.8         |         | 0.098                    | 0.103   | 0.039   | 30.138  | 0.119   | 36.688  | 1.578   | >50     | >50     | 21.751  | >50     | >50     | 1.656   | 3.153   | 2.017   | >50     | 0.079   | 0.179  | 0.110                      | 1.477  | 367.3   | 228.7  | <100   | 220.0 |
| SF162              | 0.005   | 0.009                    | 0.005   | 0.004   | 0.003   | 0.019   | 0.007   | 0.007   | 0.025   | 0.023   | 0.482   | 3.407   | >50     | >50     | >50     | >50     | >50     | 0.421   | 0.028  | >50                        | 5329.3 | 2049.0  | 5103.0 | 3043.0 |       |
| THR0.18            | >50     | >50                      | >50     | >50     | >50     | >50     | >50     | >50     | >50     | >50     | >50     | >50     | 0.007   | 0.012   | 0.016   | 0.029   | 0.013   | 2.461   | >50    | 26.379                     | <100   | 1036.0  | 107.7  | 126.0  |       |
| TRJ04551.58        | 7.095   | >50                      | 16.913  | 0.019   | 0.025   | 0.063   | 0.019   | 0.023   | 0.088   | >50     | >50     | >50     | >50     | >50     | >50     | >50     | >50     | 0.060   | 0.028  | 0.858                      | 152.5  | 400.2   | 1416.1 | 617.0  |       |
| TR0.11             | 0.008   | 0.011                    | 0.008   | 0.111   | 0.041   | 0.079   | 0.018   | 0.257   | 1.913   | 0.030   | 0.073   | 9.349   | 0.383   | 0.270   | 0.219   | 4.728   | 0.044   | 0.186   | 0.121  | 16.865                     | 2706.9 | 861.3   | 454.5  | 2740.0 |       |
| VLGCB3             | 0.005   | 0.008                    | 0.004   | 0.015   | 0.007   | 0.022   | 0.012   | 4.596   | >50     | 0.142   | >50     | 3.361   | >50     | >50     | >50     | >50     | >50     | 0.108   | 0.045  | 0.022                      | 2967.7 | 238.5   | 1333.0 | 754.0  |       |
| NL43               | >50     | >50                      | >50     | >50     | >50     | >50     | >50     | >50     | >50     | 8.034   | 27.695  | 17.444  | >50     | >50     | >50     | >50     | 0.006   | 0.100   | 0.028  | >50                        | 418.2  | 3308.8  | 3033.8 | 1184.0 |       |
| JRC5F              | 0.027   | 0.057                    | 0.046   | 0.004   | 0.008   | 0.018   | 0.003   | 0.010   | 0.029   | 0.131   | >50     | >50     | 0.009   | 0.010   | 0.007   | 0.149   | 0.002   | 0.164   | 0.078  | 0.003                      | 863.0  | 6255.4  | 2371.1 | 433.0  |       |
| 93IN905            | 0.005   | 0.013                    | 0.004   | 0.009   | 0.015   | 0.024   | 0.009   | 0.020   | 0.177   | 0.011   | 0.011   | 0.042   | 0.001   | 0.001   | 0.002   | 0.132   | 0.002   | 0.138   | 0.332  | 0.035                      | 4396.9 | 14817.0 | 1313.8 | 3667.0 |       |
| 93MW959            | 0.013   | 0.016                    | 0.011   | 37.481  | 9.441   | 6.951   | 0.045   | 8.548   | >50     | >50     | >50     | >50     | 0.003   | 0.001   | 0.002   | 0.332   | 1.203   | 0.053   | >50    | 0.054                      | 1602.2 | 6171.8  | 176.1  | 506.0  |       |
| 97ZA012            | 0.002   | 0.004                    | 0.002   | 2.465   | 0.042   | >50     | 0.019   | 1.318   | 1.814   | >50     | >50     | >50     | >50     | >50     | >50     | >50     | 0.915   | 0.088   | 0.041  | 3.400                      | 8150.0 | 1083.1  | 433.0  | 594.0  |       |
| 98IN022            | 0.007   | 0.032                    | 0.011   | 22.057  | 0.279   | 19.189  | 0.014   | >50     | >50     | 0.014   | 13.622  | 0.408   | 0.001   | 0.001   | 0.001   | 0.171   | 0.005   | 0.342   | 5.693  | 0.003                      | 3711.8 | 15197.1 | 729.6  | 1918.0 |       |
| MGRM-C-001         | 17.482  | 19.103                   | 42.406  | >50     | >50     | >50     | >50     | >50     | >50     | 10.121  | 7.518   | 21.503  | >50     | >50     | >50     | >50     | >50     | 1.369   | >50    | >50                        | <100   | 117.0   | <100   | 174.0  |       |
| MGRM-C-002         | 0.019   | 0.022                    | 0.010   | 0.008   | 0.011   | 0.057   | 0.019   | >50     | >50     | >50     | >50     | 8.034   | 7.834   | 10.535  | 6.766   | >50     | 0.008   | 0.577   | >50    | >50                        | 1799.2 | 733.6   | 704.1  | 556.0  |       |
| MGRM-C-004         | 0.011   | 0.020                    | 0.009   | 1.825   | 0.033   | 0.532   | 0.025   | 2.756   | 3.714   | 0.046   | 0.034   | 0.026   | >50     | >50     | >50     | >50     | >50     | 1.007   | 0.899  | 2.011                      | 2177.9 | 234.5   | 327.9  | 2064.0 |       |
| MGRM-C-005         | 0.015   | 0.027                    | 0.012   | 2.087   | 0.298   | 0.570   | 0.030   | 0.935   | 1.356   | >50     | >50     | >50     | 8.832   | 1.854   | 9.192   | >50     | >50     | 5.417   | 23.898 | 8.742                      | 1323.5 | 405.1   | 383.0  | 604.0  |       |
| MGRM-C-006         | 0.017   | 0.018                    | 0.021   | 0.015   | 0.014   | 0.319   | 0.014   | 0.095   | 0.611   | >50     | >50     | >50     | 0.330   | 0.478   | 0.369   | 48.894  | 0.010   | 2.202   | >50    | 0.427                      | 1681.6 | 1231.3  | 532.3  | 564.0  |       |
| MGRM-C-007         | 0.196   | 3.348                    | 0.547   | >50     | 25.298  | >50     | 0.111   | >50     | >50     | >50     | >50     | >50     | >50     | >50     | >50     | >50     | >50     | >50     | 0.064  | 330.7                      | 244.2  | <100    | 442.0  |        |       |
| MGRM-C-008         | 0.012   | 0.028                    | 0.011   | >50     | 2.118   | >50     | 0.373   | 7.277   | >50     | >50     | >50     | >50     | >50     | >50     | >50     | >50     | >50     | 1.445   | 0.791  | >50                        | 1742.3 | 223.3   | <100   | 903.0  |       |
| MGRM-C-009         | >50     | >50                      | >50     | >50     | >50     | >50     | >50     | >50     | >50     | >50     | >50     | >50     | 0.143   | 0.061   | 0.121   | 0.561   | 0.193   | 0.261   | 1.042  | >50                        | <100   | 460.9   | <100   | 224.0  |       |
| MGRM-C-010         | >50     | >50                      | >50     | >50     | >50     | >50     | >50     | >50     | >50     | >50     | >50     | >50     | 0.411   | 0.070   | 0.171   | 7.616   | 0.141   | 0.085   | 0.299  | >50                        | <100   | 836.6   | <100   | 316.0  |       |
| MGRM-C-012         | 0.123   | 2.002                    | 0.606   | >50     | 0.111   | 1.073   | 0.058   | >50     | >50     | 0.017   | >50     | 0.102   | >50     | >50     | >50     | >50     | 6.984   | 0.073   | 0.025  | 0.610                      | 716.3  | 521.6   | 169.8  | 2150.0 |       |
| MGRM-C-013         | 7.228   | 32.575                   | 14.879  | >50     | >50     | >50     | >50     | >50     | >50     | >50     | >50     | >50     | >50     | >50     | >50     | >50     | >50     | >50     | >50    | >50                        | <100   | <100    | <100   | 453.0  |       |
| MGRM-C-014         | 26.941  | >50                      | 1.003   | >50     | >50     | >50     | >50     | >50     | >50     | >50     | >50     | >50     | 11.807  | 6.024   | 8.811   | >50     | 5.816   | >50     | 21.190 | 1.099                      | <100   | 702.6   | <100   | <100   |       |
| MGRM-C-015         | 25.071  | >50                      | 13.141  | >50     | 3.140   | >50     | 0.196   | 0.344   | 1.015   | 0.104   | 11.066  | 1.983   | 0.033   | 0.038   | 0.085   | 0.236   | 0.120   | 1.569   | 0.983  | 0.427                      | 141.6  | 544.2   | 253.4  | 1095.0 |       |

| Isolate     | Subtype  | IC <sub>50</sub> (µg/mL) |         |         |         |         |         |         |         |         |         |         |         |         |         |         |         |         |        | IC <sub>50</sub> (1/dil'n) |        |        |        |        |        |
|-------------|----------|--------------------------|---------|---------|---------|---------|---------|---------|---------|---------|---------|---------|---------|---------|---------|---------|---------|---------|--------|----------------------------|--------|--------|--------|--------|--------|
|             |          | PGT-121                  | PGT-122 | PGT-123 | PGT-125 | PGT-126 | PGT-127 | PGT-128 | PGT-130 | PGT-131 | PGT-135 | PGT-136 | PGT-137 | PGT-141 | PGT-142 | PGT-143 | PGT-144 | PGT-145 | VRC01  | PGV04                      | PG9    | #17    | #84    | #36    | #39    |
| 98CN009     | CRF07_BC | 0.009                    | 0.013   | 0.007   | 0.030   | 0.019   | 0.090   | 0.025   | 0.136   | 4.051   | 0.071   | 0.428   | 5.059   | 1.277   | 3.999   | 10.206  | >50     | 0.136   | 0.346  | 0.125                      | 0.371  | 2551.0 | 1469.5 | 756.3  | 1430.0 |
| 98CN006     | CRF08_BC | 0.010                    | 0.021   | 0.008   | 0.201   | 0.046   | 0.067   | 0.015   | 0.258   | 35.286  | 0.429   | 0.406   | 1.217   | >50     | >50     | >50     | >50     | >50     | 0.655  | 1.320                      | >50    | 1908.7 | 365.2  | 367.0  | 980.0  |
| 92UG001     |          | >50                      | >50     | >50     | >50     | >50     | >50     | >50     | >50     | >50     | >50     | >50     | >50     | >50     | >50     | >50     | >50     | >50     | 1.159  | 0.553                      | >50    | <100   | <100   | <100   | 260.0  |
| 92UG005     |          | 18.292                   | >50     | 9.794   | >50     | 0.037   | 1.107   | 0.018   | 0.959   | 0.854   | >50     | >50     | >50     | >50     | >50     | >50     | >50     | >50     | 0.576  | 0.440                      | >50    | 265.5  | <100   | 590.3  | 480.0  |
| 92UG024     |          | >50                      | >50     | >50     | >50     | >50     | >50     | >50     | >50     | >50     | 0.010   | 0.052   | 0.106   | >50     | >50     | >50     | >50     | 1.600   | 0.576  | 0.201                      | 1.861  | <100   | 202.0  | 138.1  | 1930.0 |
| 92UG046     |          | >50                      | >50     | >50     | >50     | >50     | >50     | >50     | >50     | >50     | >50     | >50     | >50     | >50     | >50     | >50     | >50     | >50     | 12.687 | 22.362                     | 1.861  | <100   | 200.5  | <100   | 137.0  |
| 94UG114     |          | 0.004                    | 0.011   | 0.005   | 0.349   | 0.038   | 7.091   | 0.083   | >50     | >50     | 1.289   | >50     | >50     | >50     | >50     | >50     | >50     | 20.113  | 0.330  | 0.461                      | 40.608 | 5390.2 | <100   | 292.1  | 548.0  |
| MGRM-D-001  |          | 0.615                    | 1.130   | 0.147   | 2.837   | 0.084   | 2.234   | 0.138   | >50     | >50     | >50     | >50     | >50     | >50     | >50     | >50     | >50     | 0.560   | >50    | >50                        | >50    | <100   | <100   | 112.8  | <100   |
| MGRM-D-002  |          | 0.006                    | 0.005   | 0.012   | 0.118   | 0.039   | 0.600   | 0.011   | 0.869   | 11.150  | >50     | >50     | >50     | >50     | >50     | >50     | >50     | >50     | 0.252  | 0.322                      | 0.021  | 5960.5 | <100   | 726.4  | 442.0  |
| MGRM-D-003  |          | 10.685                   | >50     | 3.736   | 0.065   | 0.021   | 0.029   | 0.019   | 0.651   | 19.624  | >50     | >50     | >50     | >50     | >50     | >50     | >50     | 0.006   | 2.064  | >50                        | 0.033  | 183.1  | 695.8  | 414.7  | 176.0  |
| MGRM-D-004  |          | >50                      | >50     | >50     | 0.371   | >50     | >50     | 24.887  | 1.208   | 2.007   | >50     | >50     | >50     | >50     | >50     | >50     | >50     | 10.881  | 1.250  | 43.200                     | 0.060  | <100   | 125.9  | 108.5  | 397.0  |
| MGRM-D-005  |          | >50                      | >50     | >50     | >50     | 0.792   | 6.044   | 0.051   | >50     | >50     | >50     | >50     | >50     | 5.154   | 1.153   | 1.414   | 14.807  | 10.398  | >50    | >50                        | 1.802  | <100   | 235.9  | 109.3  | 249.0  |
| MGRM-D-008  |          | >50                      | >50     | >50     | >50     | 43.139  | >50     | 0.033   | >50     | >50     | >50     | >50     | >50     | 0.371   | 0.174   | 0.153   | 9.849   | 0.025   | 0.854  | 3.564                      | 11.454 | <100   | 348.8  | <100   | 356.0  |
| MGRM-D-011  |          | 0.018                    | 0.019   | 0.012   | 0.008   | 0.009   | 0.015   | 0.007   | 0.019   | 0.756   | 23.478  | >50     | 6.297   | >50     | >50     | >50     | >50     | 14.655  | 0.075  | 0.025                      | 0.071  | 1037.5 | 123.2  | 769.0  | 498.0  |
| MGRM-D-012  | D        | >50                      | >50     | >50     | >50     | >50     | >50     | >50     | >50     | >50     | >50     | >50     | >50     | >50     | >50     | >50     | >50     | 0.216   | 0.125  | 16.182                     | <100   | 109.0  | 109.1  | 261.0  |        |
| MGRM-D-013  |          | >50                      | >50     | >50     | >50     | >50     | 8.847   | 0.429   | 4.141   | >50     | >50     | >50     | 0.179   | 0.221   | 0.386   | >50     | 3.480   | 0.087   | 0.088  | 0.210                      | <100   | 745.4  | 422.8  | 377.0  |        |
| MGRM-D-014  |          | 0.009                    | 0.012   | 0.009   | 0.120   | 0.030   | 0.393   | 0.013   | 0.061   | 0.516   | 2.209   | >50     | >50     | 0.010   | 0.005   | 0.009   | 0.113   | 2.511   | 0.332  | 0.194                      | 0.023  | 2249.9 | 1526.5 | 428.0  | 322.0  |
| MGRM-D-016  |          | >50                      | >50     | >50     | >50     | >50     | >50     | >50     | >50     | >50     | >50     | >50     | >50     | >50     | >50     | >50     | >50     | >50     | 0.452  | 0.201                      | 0.098  | <100   | 282.7  | 203.4  | 253.0  |
| MGRM-D-018  |          | 0.005                    | 0.007   | 0.007   | 0.049   | 0.009   | 0.021   | 0.008   | 0.049   | 0.148   | 0.039   | >50     | 15.100  | >50     | >50     | >50     | >50     | 0.065   | >50    | 17.528                     | 0.025  | 6632.6 | 259.2  | 1730.4 | 642.0  |
| MGRM-D-019  |          | >50                      | >50     | >50     | >50     | >50     | >50     | >50     | >50     | >50     | >50     | >50     | >50     | 1.655   | 0.155   | 0.277   | >50     | 0.111   | 0.119  | 0.350                      | 0.038  | <100   | 296.7  | 260.0  | 467.0  |
| MGRM-D-020  |          | 0.010                    | 0.007   | 0.018   | 0.015   | 0.023   | 0.015   | 0.011   | 24.677  | >50     | >50     | >50     | >50     | >50     | >50     | >50     | >50     | 10.003  | 0.192  | 0.097                      | 1.665  | 2488.0 | <100   | 393.5  | 190.0  |
| MGRM-D-021  |          | 5.334                    | 11.735  | 11.120  | 0.040   | 0.047   | 0.056   | 0.014   | 0.156   | 0.106   | >50     | >50     | >50     | >50     | >50     | >50     | >50     | >50     | 33.445 | >50                        | >50    | <100   | <100   | 457.5  | 148.0  |
| MGRM-D-022  |          | >50                      | >50     | >50     | >50     | >50     | >50     | >50     | >50     | >50     | >50     | >50     | >50     | >50     | >50     | >50     | >50     | 34.305  | >50    | >50                        | >50    | <100   | <100   | <100   | <100   |
| MGRM-D-024  |          | 0.038                    | 0.185   | 0.023   | >50     | 0.376   | 1.945   | 0.067   | >50     | >50     | >50     | >50     | >50     | >50     | >50     | >50     | >50     | 0.224   | 0.366  | >50                        | 0.038  | 355.3  | 144.4  | 124.7  | 399.0  |
| MGRM-D-026  |          | >50                      | >50     | >50     | >50     | >50     | >50     | >50     | >50     | >50     | >50     | >50     | 32.480  | 12.512  | 44.566  | >50     | 0.410   | 0.435   | 1.761  | 23.664                     | <100   | 401.4  | 103.2  | <100   |        |
| MGRM-D-028  |          | 0.009                    | 3.338   | 0.132   | >50     | >50     | >50     | >50     | 0.825   | >50     | >50     | >50     | >50     | >50     | >50     | >50     | >50     | 0.721   | 0.377  | 1.008                      | 20.234 | 2028.2 | 259.0  | <100   | 563.0  |
| MGRM-D-029  |          | >50                      | >50     | >50     | >50     | >50     | >50     | >50     | >50     | >50     | 30.849  | >50     | >50     | 0.057   | 0.192   | 0.200   | 0.459   | 0.030   | 3.224  | 1.557                      | >50    | <100   | 291.4  | <100   | 387.0  |
| MGRM-F1-004 |          | 1.665                    | 1.291   | 1.783   | 0.035   | 0.063   | 0.068   | 0.027   | 0.023   | 0.114   | 0.211   | >50     | 40.343  | 0.021   | 0.013   | 0.036   | 0.105   | 0.361   | 0.305  | 0.580                      | 0.175  | 260.7  | 874.0  | 687.6  | 366.0  |
| MGRM-F1-006 |          | 5.328                    | 3.266   | 6.894   | 0.361   | 0.078   | 7.172   | 0.763   | >50     | >50     | >50     | >50     | >50     | 8.993   | 12.874  | 12.341  | 20.563  | 13.642  | 2.856  | >50                        | 7.249  | <100   | 147.3  | 110.8  | 487.0  |
| MGRM-F1-008 |          | >50                      | >50     | >50     | >50     | >50     | >50     | 0.065   | 2.742   | >50     | >50     | >50     | >50     | 0.193   | 0.124   | 0.189   | 0.507   | 0.228   | 1.114  | 1.031                      | >50    | <100   | 242.1  | <100   | 308.0  |
| MGRM-F1-010 |          | 0.016                    | 0.024   | 0.016   | >50     | >50     | >50     | 16.663  | >50     | >50     | >50     | >50     | >50     | >50     | >50     | >50     | >50     | 3.321   | 0.097  | 0.184                      | 0.012  | 825.3  | 420.4  | <100   | 564.0  |
| MGRM-F1-012 |          | 1.907                    | >50     | 22.222  | >50     | 0.300   | >50     | 0.007   | >50     | >50     | 0.010   | >50     | >50     | >50     | >50     | >50     | >50     | 0.113   | 0.488  | 0.250                      | 0.023  | 573.3  | 332.3  | 299.8  | 1366.0 |
| MGRM-F1-013 |          | 0.083                    | 0.152   | 0.080   | >50     | >50     | >50     | 12.723  | >50     | >50     | 21.080  | >50     | >50     | 0.043   | 0.023   | 0.013   | 0.509   | 0.402   | 0.170  | 0.084                      | 1.253  | 283.9  | 2403.4 | 377.4  | 625.0  |
| MGRM-F1-014 |          | 0.082                    | 0.195   | 0.111   | >50     | >50     | >50     | 0.277   | 11.795  | >50     | >50     | >50     | >50     | 0.001   | 0.001   | 0.001   | 0.014   | 0.009   | 0.056  | 0.020                      | 0.020  | 314.2  | 6934.5 | <100   | 538.0  |
| MGRM-F1-015 | F        | 28.359                   | 31.437  | >50     | >50     | >50     | >50     | >50     | >50     | >50     | 1.114   | >50     | >50     | >50     | >50     | >50     | >50     | 1.764   | 0.387  | 0.179                      | >50    | <100   | 145.7  | <100   | 234.0  |
| MGRM-F1-016 |          | 0.931                    | 4.808   | 4.948   | >50     | >50     | >50     | 1.209   | >50     | >50     | >50     | >50     | >50     | >50     | >50     | >50     | >50     | 17.531  | 0.517  | 0.268                      | 0.518  | 110.3  | 103.0  | <100   | 407.0  |
| MGRM-F1-017 |          | 16.891                   | >50     | >50     | >50     | >50     | >50     | 11.659  | >50     | >50     | 7.788   | >50     | >50     | 30.829  | 23.465  | 26.279  | >50     | 0.286   | 1.077  | 2.383                      | >50    | <100   | 279.4  | <100   | 832.0  |
| MGRM-F1-018 |          | 0.040                    | 0.563   | 0.054   | >50     | 14.941  | 3.586   | 0.023   | >50     | >50     | >50     | >50     | >50     | 0.785   | 0.404   | 0.701   | >50     | 1.020   | 0.032  | 0.027                      | 0.019  | 770.0  | 518.6  | 151.2  | 391.0  |
| MGRM-F1-020 |          | 0.167                    | 0.321   | 0.051   | >50     | >50     | >50     | 0.355   | 9.728   | >50     | 0.168   | 9.311   | 1.931   | 1.152   | 0.824   | 0.980   | 8.929   | 0.816   | 1.890  | 5.987                      | 6.396  | 305.4  | 220.8  | <100   | 306.0  |
| MGRM-F1-021 |          | 0.099                    | 2.301   | 0.307   | >50     | >50     | >50     | >50     | >50     | >50     | 0.065   | >50     | >50     | >50     | >50     | >50     | >50     | 8.038   | 0.039  | 0.031                      | >50    | 227.6  | 505.7  | 218.7  | 919.0  |
| MGRM-F1-022 |          | 0.104                    | 0.277   | 0.075   | >50     | >50     | >50     | 4.545   | >50     | >50     | 0.964   | 2.418   | 6.231   | 0.114   | 0.040   | 0.082   | 0.382   | 0.009   | 0.055  | 0.072                      | 0.028  | 350.0  | 1296.4 | 221.3  | 638.0  |
| MGRM-F1-023 |          | 0.097                    | 0.154   | 0.053   | 0.012   | 0.009   | 0.119   | 0.007   | 0.050   | >50     | 0.088   | >50     | >50     | 0.307   | 0.602   | 0.972   | 1.163   | 5.879   | 0.392  | 0.171                      | >50    | 362.3  | 337.3  | 674.5  | 2177.0 |

| Isolate    | Subtype | IC <sub>50</sub> (µg/mL) |         |         |         |         |         |         |         |         |         |         |         |         |         |         |         |         |        | IC <sub>50</sub> (1/dil'n) |        |        |        |        |        |       |
|------------|---------|--------------------------|---------|---------|---------|---------|---------|---------|---------|---------|---------|---------|---------|---------|---------|---------|---------|---------|--------|----------------------------|--------|--------|--------|--------|--------|-------|
|            |         | PGT-121                  | PGT-122 | PGT-123 | PGT-125 | PGT-126 | PGT-127 | PGT-128 | PGT-130 | PGT-131 | PGT-135 | PGT-136 | PGT-137 | PGT-141 | PGT-142 | PGT-143 | PGT-144 | PGT-145 | VRC01  | PGV04                      | PG9    | #17    | #84    | #36    | #39    |       |
| MGRM-G-001 | G       | 0.004                    | 0.005   | 0.009   | 0.033   | 0.038   | 0.113   | 0.019   | 0.198   | 0.404   | 0.393   | 8.113   | 41.703  | 0.392   | 0.362   | 0.423   | >50     | 0.028   | 0.371  | >50                        | 0.166  | 5296.0 | 557.6  | 635.9  | 169.0  |       |
| MGRM-G-004 |         | 0.115                    | 2.146   | 0.181   | >50     | >50     | >50     | >50     | >50     | >50     | >50     | >50     | >50     | >50     | >50     | >50     | >50     | >50     | >50    | >50                        | >50    | >50    | 600.5  | 157.8  | 107.3  | 574.0 |
| MGRM-G-006 |         | >50                      | >50     | >50     | >50     | >50     | >50     | >50     | >50     | >50     | >50     | >50     | >50     | >50     | 0.043   | 0.019   | 0.031   | 3.843   | 0.286  | 0.055                      | 0.083  | 1.983  | <100   | 548.1  | <100   | <100  |
| MGRM-G-009 |         | 0.020                    | 0.514   | 33.546  | >50     | >50     | >50     | >50     | >50     | >50     | >50     | >50     | >50     | >50     | 1.890   | 2.811   | 2.968   | >50     | 0.982  | 0.073                      | 0.043  | 10.704 | 160.3  | 336.3  | <100   | 345.0 |
| MGRM-G-011 |         | 3.167                    | 31.299  | 14.900  | >50     | 7.318   | >50     | 8.212   | >50     | >50     | >50     | >50     | >50     | >50     | 0.086   | 0.046   | 0.074   | 1.577   | 0.028  | 0.065                      | 0.780  | 0.335  | <100   | 641.1  | <100   | 891.0 |
| MGRM-G-013 |         | 3.991                    | 3.448   | 3.969   | >50     | 48.845  | 7.699   | 0.995   | >50     | >50     | >50     | >50     | >50     | >50     | >50     | >50     | >50     | >50     | >50    | 0.553                      | 0.168  | >50    | 100.5  | 561.4  | 480.3  | 629.0 |
| MGRM-G-014 |         | 0.009                    | 0.008   | 0.005   | 0.007   | 0.009   | 0.009   | 0.004   | 2.226   | 4.313   | >50     | >50     | >50     | >50     | 0.222   | 0.076   | 0.107   | 0.562   | 0.144  | 0.056                      | 0.056  | 16.478 | 3593.5 | 389.5  | 1058.0 | 295.0 |
| MGRM-G-015 |         | >50                      | >50     | >50     | >50     | >50     | >50     | >50     | >50     | >50     | >50     | >50     | >50     | >50     | >50     | >50     | >50     | >50     | 10.465 | 0.548                      | 0.333  | 6.599  | <100   | <100   | <100   | 266.0 |
| MGRM-G-016 |         | >50                      | >50     | >50     | >50     | >50     | >50     | >50     | >50     | >50     | >50     | >50     | >50     | >50     | 4.690   | 8.170   | 7.600   | >50     | 0.081  | 0.063                      | 0.019  | 1.363  | <100   | 681.8  | 106.0  | 440.0 |
| MGRM-G-017 |         | 0.004                    | 0.032   | 0.026   | >50     | >50     | >50     | 0.319   | >50     | >50     | 0.137   | >50     | 34.905  | 0.164   | 0.125   | 0.107   | 9.972   | 0.205   | 0.124  | 0.065                      | 0.104  | 1582.3 | 701.7  | 282.9  | 420.0  |       |
| MGRM-G-019 |         | 0.011                    | 0.016   | 0.008   | >50     | 0.018   | 0.429   | 0.010   | 27.938  | >50     | 0.145   | 44.285  | 0.126   | 20.310  | 5.949   | 4.773   | >50     | 0.041   | 0.060  | 0.027                      | 14.559 | 1416.7 | 253.3  | 354.8  | 524.0  |       |
| MGRM-G-024 |         | 0.014                    | 0.033   | 0.032   | >50     | >50     | >50     | 0.095   | 5.838   | 10.730  | 0.062   | 0.152   | 0.051   | 0.051   | 0.054   | 0.048   | 7.923   | 0.060   | 0.025  | 0.033                      | 0.163  | 1077.4 | 388.2  | 131.5  | 516.0  |       |
| MGRM-G-025 |         | 0.063                    | 0.079   | 0.046   | >50     | 17.054  | 19.279  | 0.017   | 8.452   | 7.750   | 0.592   | >50     | >50     | >50     | >50     | >50     | >50     | >50     | 0.292  | 1.608                      | >50    | 396.1  | 129.5  | 164.2  | 213.0  |       |
| MGRM-G-027 |         | 0.124                    | 0.606   | 0.182   | 34.414  | 0.875   | >50     | 0.313   | 4.137   | 2.904   | 0.062   | 45.222  | 0.228   | >50     | >50     | >50     | >50     | 0.433   | 0.360  | 0.125                      | 0.007  | 289.0  | 140.8  | 143.4  | 676.0  |       |
| MGRM-G-028 |         | 0.014                    | 0.010   | 0.008   | 0.012   | 0.012   | 0.032   | 0.008   | 0.074   | 0.466   | >50     | >50     | >50     | 24.888  | 30.309  | 42.988  | >50     | 0.046   | 0.164  | 0.352                      | 0.891  | 2769.4 | 522.4  | 1201.4 | 621.0  |       |
| aMLV       |         | negative                 | >50     | >50     | >50     | >50     | >50     | >50     | >50     | >50     | >50     | >50     | >50     | >50     | >50     | >50     | >50     | >50     | >50    | >50                        | >50    | >50    | <100   | <100   | <100   | <100  |

**Supplementary Table 5. Binding activity of PGT mAbs.**

| Donor | mAb | EC <sub>50</sub> (µg/ml) <sup>a</sup> |                     |                 |                            |
|-------|-----|---------------------------------------|---------------------|-----------------|----------------------------|
|       |     | WT JR-FL gp120                        | JR-FL gp120 ΔV1/ΔV2 | JR-FL gp120 ΔV3 | Endo H treated JR-FL gp120 |
| #17   | 121 | 0.2                                   | 0.2                 | >10             | >10                        |
|       | 122 | 0.3                                   | 0.3                 | >10             | >10                        |
|       | 123 | 0.2                                   | 0.3                 | >10             | >10                        |
| #36   | 125 | 0.2                                   | 0.6                 | >10             | >10                        |
|       | 126 | 0.1                                   | 0.3                 | >10             | >10                        |
|       | 127 | 0.1                                   | 0.7                 | >10             | >10                        |
|       | 128 | 0.1                                   | 0.3                 | 7.8             | >10                        |
|       | 130 | 0.2                                   | >10                 | >10             | >10                        |
|       | 131 | 0.4                                   | >10                 | >10             | >10                        |
| #39   | 135 | 0.1                                   | 0.1                 | 0.2             | >10                        |
|       | 136 | 0.2                                   | 0.3                 | 0.1             | >10                        |
|       | 137 | 0.1                                   | 0.2                 | 0.1             | >10                        |

<sup>a</sup> Binding was evaluated by ELISA. EC<sub>50</sub> values were derived by nonlinear regression analysis.

Experiments were performed in duplicate, and data represent an average of at least two independent experiments.



**Supplementary Table 6. Neutralizing activity of PGT mAbs against a panel of JR-CSF alanine mutants.**

| Mutation <sup>a</sup> | gp120 domain <sup>b</sup> | Fold IC <sub>50</sub> increase relative to wild-type <sup>c</sup> |         |         |         |         |         |         |         |         |         |     |
|-----------------------|---------------------------|-------------------------------------------------------------------|---------|---------|---------|---------|---------|---------|---------|---------|---------|-----|
|                       |                           | PGT-121                                                           | PGT-122 | PGT-123 | PGT-125 | PGT-126 | PGT-127 | PGT-128 | PGT-130 | PGT-131 | PGT-135 |     |
| D113A                 | C1                        | 1.2                                                               | 1.0     | 1.1     | 1.1     | 1.2     | 0.3     | 0.5     | 0.8     | ND      | 0.8     |     |
| V120A                 |                           | 0.8                                                               | 1.2     | 1.1     | 0.5     | 0.7     | 1.5     | 1.4     | 0.8     | 0.7     | 1.4     |     |
| L125A                 |                           | 0.9                                                               | 2.4     | 2.5     | 1.6     | 1.2     | 1.4     | 2.9     | 2.5     | 2.5     | 0.9     |     |
| V127A                 |                           | 0.7                                                               | 1.0     | 1.2     | 0.9     | 1.3     | 2.5     | 1.1     | 0.8     | 0.6     | 1.4     |     |
| N134A                 | V1                        | 0.2                                                               | 0.3     | 0.4     | 0.5     | 0.6     | 1.0     | 1.2     | 0.6     | 0.5     | 0.2     |     |
| N156A                 | V2                        | 0.9                                                               | 1.1     | 6.2     | 3.6     | 1.8     | 1.6     | 0.4     | 1.5     | 1.0     | 0.3     |     |
| N160K                 |                           | 1.1                                                               | 1.1     | 1.0     | 0.5     | 0.5     | 0.8     | 1.0     | 3.4     | 0.4     | 7.7     |     |
| T162A                 |                           | 0.3                                                               | 0.6     | 0.7     | 0.5     | 0.6     | 1.1     | 1.1     | 0.6     | 0.6     | 0.9     |     |
| I165A                 |                           | 3.3                                                               | 3.0     | 2.2     | 2.3     | 2.5     | 1.7     | 2.1     | 3.2     | 2.4     | 4.0     |     |
| R166A                 |                           | 1.4                                                               | 0.9     | 0.9     | 1.5     | 1.0     | 1.6     | 2.7     | 1.2     | 1.6     | 0.9     |     |
| D167A                 |                           | 1.0                                                               | 1.1     | 1.2     | 1.7     | 1.6     | 1.6     | 0.3     | 1.2     | 1.2     | 0.7     |     |
| K168A                 |                           | 1.5                                                               | 0.8     | 0.8     | 0.9     | 0.7     | 1.9     | 1.1     | 1.2     | 1.7     | 0.4     |     |
| E172A                 |                           | 1.4                                                               | 1.0     | 1.1     | 1.8     | 0.7     | 2.1     | 2.5     | 1.4     | ND      | 1.3     |     |
| Y177A                 |                           | 1.4                                                               | 2.4     | 2.4     | 1.1     | 0.9     | 2.9     | 1.4     | 3.6     | 5.3     | 0.3     |     |
| L179A                 |                           | 1.9                                                               | 1.1     | 1.2     | 1.3     | 2.6     | 2.5     | 2.8     | 2.4     | 4.8     | 1.2     |     |
| V182A                 |                           | 2.1                                                               | 2.2     | 2.8     | 1.3     | 1.4     | 1.6     | 1.2     | 1.2     | 1.1     | 1.5     |     |
| D185A                 |                           | 1.0                                                               | 1.8     | 1.9     | 0.6     | 1.0     | 2.0     | 1.5     | 0.9     | 0.7     | 1.3     |     |
| N188A                 |                           | 0.8                                                               | 1.0     | 1.1     | 0.7     | 0.8     | 0.8     | 1.3     | 1.0     | 0.9     | 0.4     |     |
| N197A                 |                           | C2 (V1/V2 stem)                                                   | 1.1     | 1.4     | 1.4     | 1.0     | 1.1     | 0.6     | 1.0     | 1.2     | 1.1     | 0.3 |
| S199A                 |                           |                                                                   | 0.8     | 1.0     | 1.1     | 0.7     | 0.8     | 3.0     | 1.0     | 0.9     | 1.6     | 0.3 |
| T202A                 |                           |                                                                   | 1.2     | 1.5     | 1.2     | 0.8     | 0.8     | 1.8     | 1.1     | 1.2     | 2.7     | 1.8 |
| F210A                 | C2                        | 1.5                                                               | 2.6     | 2.8     | 1.4     | 1.5     | 0.8     | 0.8     | 1.7     | 1.0     | 1.3     |     |
| N241A                 |                           | 0.5                                                               | 1.4     | 0.8     | 0.5     | 0.6     | 0.6     | 0.7     | 0.6     | 0.7     | 0.1     |     |
| N262A                 |                           | 1.1                                                               | 1.1     | 0.5     | 0.9     | 1.0     | 1.4     | 1.6     | 0.7     | 0.4     | 2.1     |     |
| N276A                 |                           | 0.8                                                               | 1.4     | 1.1     | 0.9     | 0.9     | 1.6     | 0.6     | 1.0     | 0.8     | 2.5     |     |

| Mutation <sup>a</sup> | gp120 domain <sup>b</sup> | Fold IC <sub>50</sub> increase relative to wild-type <sup>c</sup> |         |         |         |         |         |         |         |         |         |     |
|-----------------------|---------------------------|-------------------------------------------------------------------|---------|---------|---------|---------|---------|---------|---------|---------|---------|-----|
|                       |                           | PGT-121                                                           | PGT-122 | PGT-123 | PGT-125 | PGT-126 | PGT-127 | PGT-128 | PGT-130 | PGT-131 | PGT-135 |     |
| V292A                 | V3                        | 2.7                                                               | 1.3     | 1.7     | 3.3     | 5.0     | 0.9     | 2.1     | 0.9     | 1.4     | 2.0     |     |
| N295A                 |                           | 0.6                                                               | 0.7     | 1.2     | 0.8     | 0.9     | 2.3     | 1.0     | 0.7     | 2.1     | >18     |     |
| T297A                 |                           | 0.7                                                               | 0.6     | 0.3     | 0.9     | 0.8     | 1.7     | 1.1     | 0.9     | 1.2     | >30     |     |
| P299A                 |                           | 0.2                                                               | 0.5     | 0.7     | 0.2     | 0.2     | 0.2     | 1.2     | 0.8     | 2.0     | 0.36    |     |
| N301A                 |                           | 0.4                                                               | 0.4     | 1.0     | 213     | 314     | >250    | 10.7    | >1000   | >170    | 0.5     |     |
| N302A                 |                           | 0.7                                                               | 1.1     | 1.3     | 0.7     | 0.9     | 3.0     | 1.5     | 1.1     | 1.0     | 0.8     |     |
| T303A                 |                           | 0.7                                                               | 2.5     | 1.1     | >250    | >250    | >500    | >500    | >250    | >170    | 0.3     |     |
| R304A                 |                           | 1.7                                                               | 0.7     | 0.7     | 1.9     | 1.8     | 0.4     | 0.7     | 2.5     | 1.5     | 0.7     |     |
| K305A                 |                           | 1.9                                                               | 3.0     | 1.9     | 1.9     | 1.0     | 2.6     | 1.8     | 6.9     | ND      | 0.2     |     |
| S306A                 |                           | 0.7                                                               | 0.5     | 0.5     | 1.2     | 0.7     | 0.6     | 1.1     | 1.5     | 0.7     | 0.4     |     |
| I307A                 |                           | 3.7                                                               | 3.8     | 5.9     | 5.0     | 1.8     | 10.2    | 3.7     | 1000.0  | >170    | 0.3     |     |
| I309A                 |                           | 1.1                                                               | 2.1     | 1.6     | 1.0     | 1.2     | 6.0     | 2.8     | >77.9   | 8.8     | 0.3     |     |
| P313A                 |                           | 0.5                                                               | 0.4     | 0.2     | 0.3     | 0.4     | 1.3     | 1.0     | 0.3     | 0.52    | 0.5     |     |
| R315A                 |                           | 0.9                                                               | 0.5     | 0.7     | 0.9     | 1.0     | 0.3     | 0.4     | 0.6     | 0.7     | 1.8     |     |
| F317A                 |                           | 1.7                                                               | 3.4     | 3.1     | 1.8     | 1.0     | 0.2     | 0.8     | 17.0    | 96      | 0.5     |     |
| T319A                 |                           | 1.3                                                               | 0.5     | 0.4     | 1.1     | 0.8     | 1.0     | 0.5     | 1.6     | 0.9     | 0.4     |     |
| T320A                 |                           | 1.2                                                               | 0.7     | 0.7     | 0.8     | 0.6     | 1.8     | 1.0     | 0.9     | 4.5     | 0.5     |     |
| E321aA                |                           | 0.3                                                               | 0.4     | 0.6     | 1.0     | 0.6     | 1.9     | 1.3     | 1.7     | 1.8     | 0.8     |     |
| I323A                 |                           | 1.9                                                               | 2.2     | 1.0     | 0.9     | 0.9     | 4.0     | 3.0     | 0.8     | 38.0    | 1.5     |     |
| G324A                 |                           | 16.6                                                              | 12.5    | 14.5    | 1.7     | 3.3     | ND      | ND      | >50     | ND      | 0.4     |     |
| D325A                 |                           | 2.0                                                               | 44.0    | 64.0    | 0.4     | 0.5     | 0.93    | 0.5     | >1000   | >170    | 0.5     |     |
| I326A                 |                           | 0.7                                                               | 0.6     | 0.4     | 0.9     | 0.8     | 3.5     | 1.6     | 1.3     | 1.7     | 1.2     |     |
| R327A                 |                           | 2.5                                                               | 1.7     | 1.7     | 2.1     | 2.2     | 1.8     | 2.5     | 2.4     | 19.0    | 0.67    |     |
| H330A                 |                           | 0.8                                                               | 0.5     | 0.3     | 0.7     | 0.5     | 0.5     | 0.3     | 0.9     | 0.5     | >250    |     |
| N332A                 |                           | >200                                                              | >200    | >200    | 2.0     | 181     | >100    | 1.4     | 0.6     | 0.5     | >250    |     |
| S334A                 |                           | >50                                                               | >50     | >50     | 0.8     | >30     | >500    | 1.4     | 0.5     | 0.4     | >30     |     |
| Q337A                 |                           | C3                                                                | 1.0     | 0.5     | 0.5     | 0.8     | 0.4     | 0.5     | 0.7     | 1.0     | 1.3     | 2.1 |
| N339A                 |                           |                                                                   | 0.5     | 0.4     | 0.8     | 0.9     | 0.6     | 1.1     | 0.8     | 0.2     | 1.0     | 1.2 |
| T341A                 | 0.5                       |                                                                   | 0.3     | 0.3     | 1.1     | 0.5     | 1.7     | 1.3     | 0.8     | 1.3     | 0.6     |     |
| K343A                 | 0.6                       |                                                                   | 0.3     | 0.3     | 0.7     | 1.2     | 1.0     | 1.0     | 1.1     | 1.1     | 1.1     |     |
| R350A                 | 0.8                       |                                                                   | 0.6     | 0.5     | 0.6     | 0.7     | 1.1     | 1.0     | 0.5     | 1.3     | 0.9     |     |
| N355A                 | 1.4                       |                                                                   | 0.8     | 0.5     | 1.2     | 0.2     | 1.4     | 0.7     | 1.3     | 2.3     | 0.8     |     |
| N386A                 | 1.3                       |                                                                   | 1.2     | 1.4     | 0.8     | 0.9     | 0.6     | 1.1     | 0.1     | 1.1     | 0.3     |     |
| S387A                 | 0.5                       |                                                                   | 0.9     | 0.9     | 0.6     | 0.6     | 1.0     | 1.2     | 0.7     | 1.1     | 0.6     |     |
| T388A                 | 0.9                       |                                                                   | 0.3     | 0.2     | 0.6     | 0.6     | 0.5     | 1.0     | 1.0     | 0.6     | 0.1     |     |

| Mutation <sup>a</sup> | gp120 domain <sup>b</sup> | Fold IC <sub>50</sub> increase relative to wild-type <sup>c</sup> |         |         |         |         |         |         |         |         |         |
|-----------------------|---------------------------|-------------------------------------------------------------------|---------|---------|---------|---------|---------|---------|---------|---------|---------|
|                       |                           | PGT-121                                                           | PGT-122 | PGT-123 | PGT-125 | PGT-126 | PGT-127 | PGT-128 | PGT-130 | PGT-131 | PGT-135 |
| N392Q                 | V4                        | 0.9                                                               | 1.0     | 1.0     | 1.2     | 1.6     | 1.1     | 0.9     | 1.2     | 0.4     | >250    |
| S393A                 |                           | 0.6                                                               | 0.5     | 0.6     | 0.5     | 0.5     | 1.2     | 1.4     | 0.7     | 1.1     | 0.9     |
| T394A                 |                           | 0.2                                                               | 0.6     | 0.4     | 0.6     | 0.6     | 1.6     | 3.0     | 1.2     | 0.9     | >75     |
| W395A                 |                           | 0.5                                                               | 0.4     | 0.4     | 0.9     | 0.6     | 1.6     | 0.8     | 0.6     | 0.5     | 0.6     |
| N396A                 |                           | 1.3                                                               | 1.1     | 1.2     | 1.6     | 1.7     | 2.4     | 0.9     | 1.0     | 0.9     | 1       |
| N411A                 |                           | 0.4                                                               | 0.7     | 0.5     | 0.5     | 0.7     | 0.8     | 0.7     | 0.6     | 0.6     | 0.2     |
| T413A                 |                           | 0.5                                                               | 0.8     | 0.4     | 0.5     | 0.7     | 0.8     | 1.0     | 0.6     | 0.6     | 0.3     |
| I414A                 |                           | 0.5                                                               | 0.5     | 0.3     | 0.3     | 0.4     | 2.2     | 1.4     | 0.7     | 1.0     | 1.2     |
| I415A                 |                           | 0.6                                                               | 0.4     | 0.4     | 0.3     | 0.3     | 2.1     | 0.7     | 0.6     | 0.6     | 5       |
| L416A                 |                           | 0.6                                                               | 1.0     | 0.9     | 0.8     | 0.8     | 1.0     | 1.1     | 1.0     | 1.0     | 1.2     |
| D417A                 |                           | 0.7                                                               | 0.5     | 0.7     | 0.5     | 1.0     | 0.4     | 0.5     | 1.0     | 1.0     | 5.0     |
| R419A                 |                           | C4                                                                | 1.8     | 0.8     | 0.7     | 1.0     | 1.2     | 2.5     | 0.5     | 2.6     | 1.7     |
| I420A                 | 3.3                       |                                                                   | 3.5     | 3.2     | 1.1     | 0.6     | 1.8     | 0.8     | 9.8     | 153     | 1.4     |
| K421A                 | 1.3                       |                                                                   | 1.2     | 0.9     | 1.2     | 0.7     | 1.5     | 2.0     | 2.9     | 11.0    | 0.3     |
| Q422A                 | 1.2                       |                                                                   | 1.1     | 0.8     | 1.2     | 1.1     | 0.1     | 0.2     | 1.0     | 1.9     | 0.8     |
| I423A                 | 3.3                       |                                                                   | 2.8     | 1.5     | 5.0     | 1.1     | 0.5     | 2.6     | >1000   | >80     | 0.1     |
| I424A                 | 0.9                       |                                                                   | 0.8     | 0.5     | 0.7     | 0.4     | 2.0     | 1.3     | 3.9     | 4.8     | 0.1     |
| E466A                 | V5                        | 1.2                                                               | 0.9     | 0.60    | 1.6     | 1.4     | 0.9     | 0.6     | 1.7     | 1.7     | 0.5     |
| F468A                 |                           | 0.8                                                               | 1.0     | 0.50    | 1.0     | 0.7     | 3.0     | 0.5     | 0.4     | 1.6     | 1.1     |
| P470A                 |                           | 0.9                                                               | 2.1     | 0.8     | 1.6     | 2.7     | 1.0     | 0.6     | 2.4     | 1.0     | 0.8     |
| G471A                 |                           | 0.8                                                               | 1.8     | 1.3     | 1.0     | 1.2     | 1.2     | 0.9     | 0.8     | 1.2     | 3       |
| D474A                 |                           | 1.3                                                               | 1.8     | 1.1     | 1.4     | 3.3     | 1.5     | 0.8     | 2.0     | 1.6     | 1.2     |
| R476A                 |                           | 1.1                                                               | 0.9     | 2.0     | 1.9     | 1.5     | 1.2     | 0.7     | 1.3     | 1.0     | 0.8     |
| D477A                 |                           | 1.9                                                               | 0.9     | 2.3     | 3.4     | 1.1     | 1.7     | 0.7     | 1.1     | 1.0     | 1.5     |
| N478A                 |                           | 0.8                                                               | 0.9     | 0.6     | 1.5     | 1.0     | 1.2     | 0.8     | 0.8     | 1.0     | 0.7     |
| R480A                 |                           | 0.8                                                               | 1.4     | 1.7     | 2.1     | 1.9     | 0.2     | 0.1     | 1.0     | 1.5     | 1.4     |

<sup>a</sup> Amino acid numbering is based on the sequence of HIV-1<sub>HXB2</sub>.

<sup>b</sup> C refers to constant domains and V refers to variable loops.

<sup>c</sup> Neutralization activity is reported as fold increase in IC<sub>50</sub> value relative to WT JR-CSF and was calculated using the equation ( IC<sub>50</sub> mutant / IC<sub>50</sub> WT).

Experiments were performed in duplicate and values represent an average of at least two independent experiments.

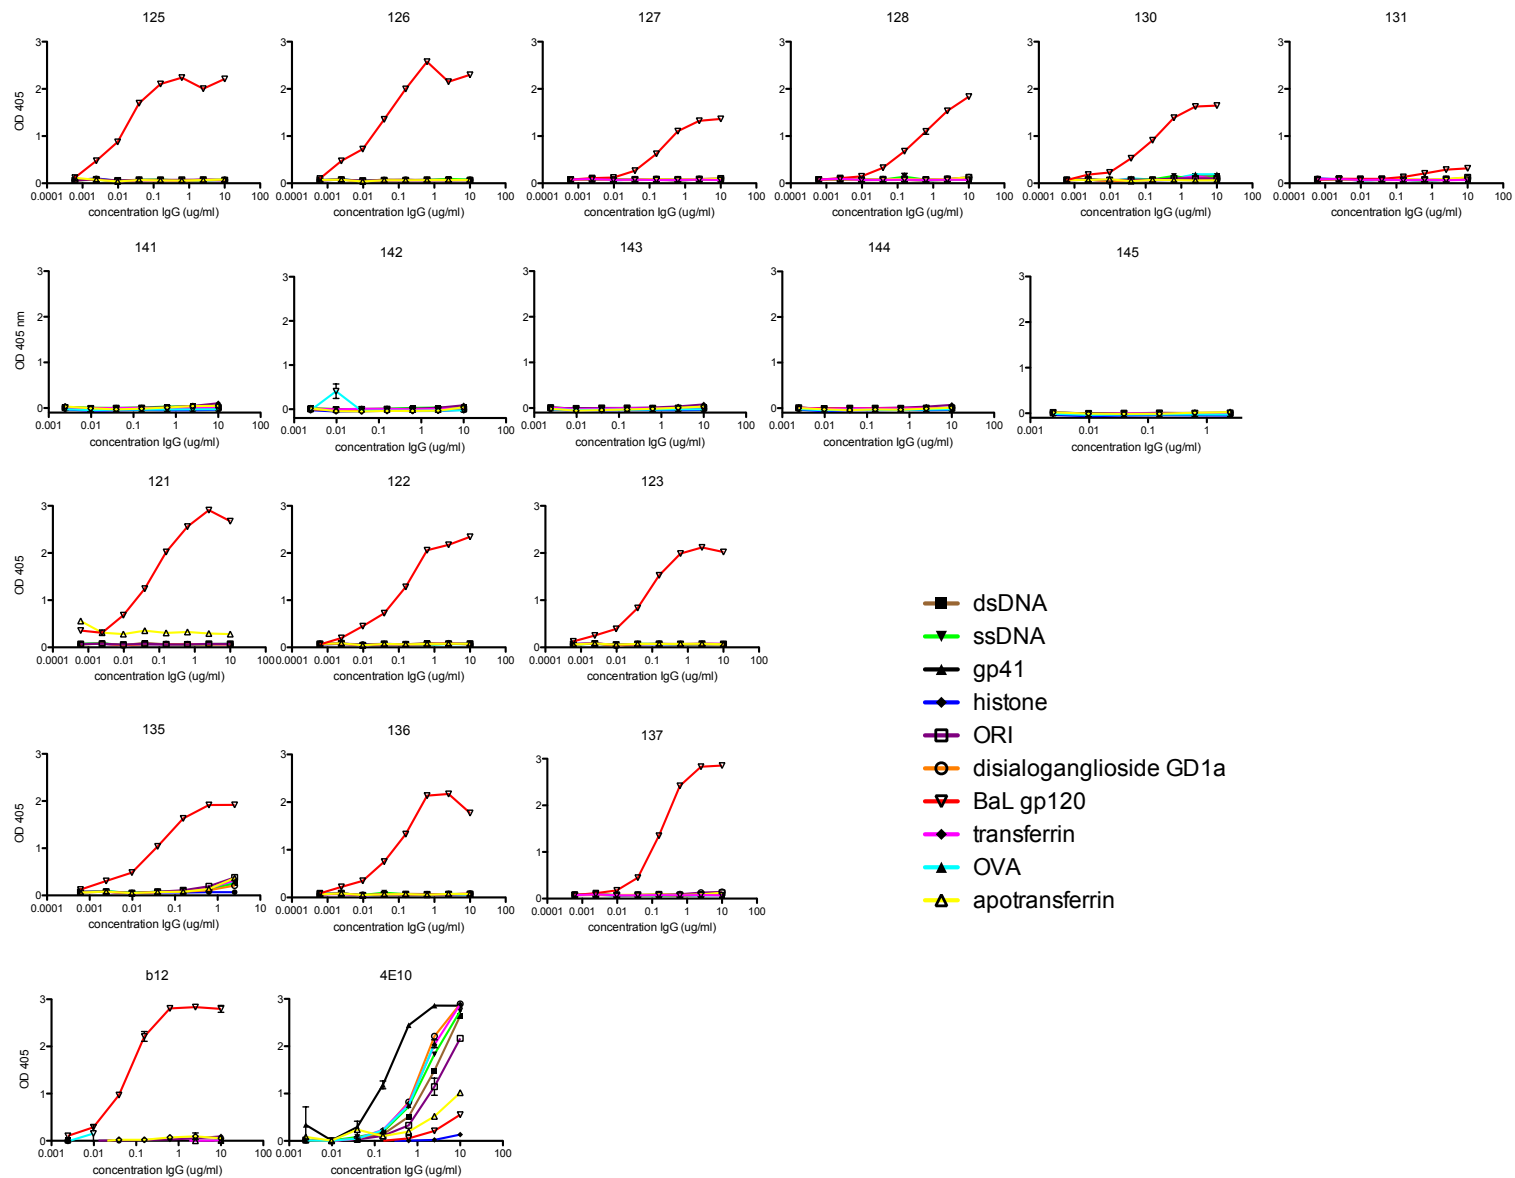

**Supplementary Figure 1. Polyreactivity ELISA assay.** PGT mAbs were tested for ELISA reactivity against a panel of antigens.

The bNAbs b12 and 4E10 were also included for comparison. d.s, double-stranded; s.s, single-stranded.

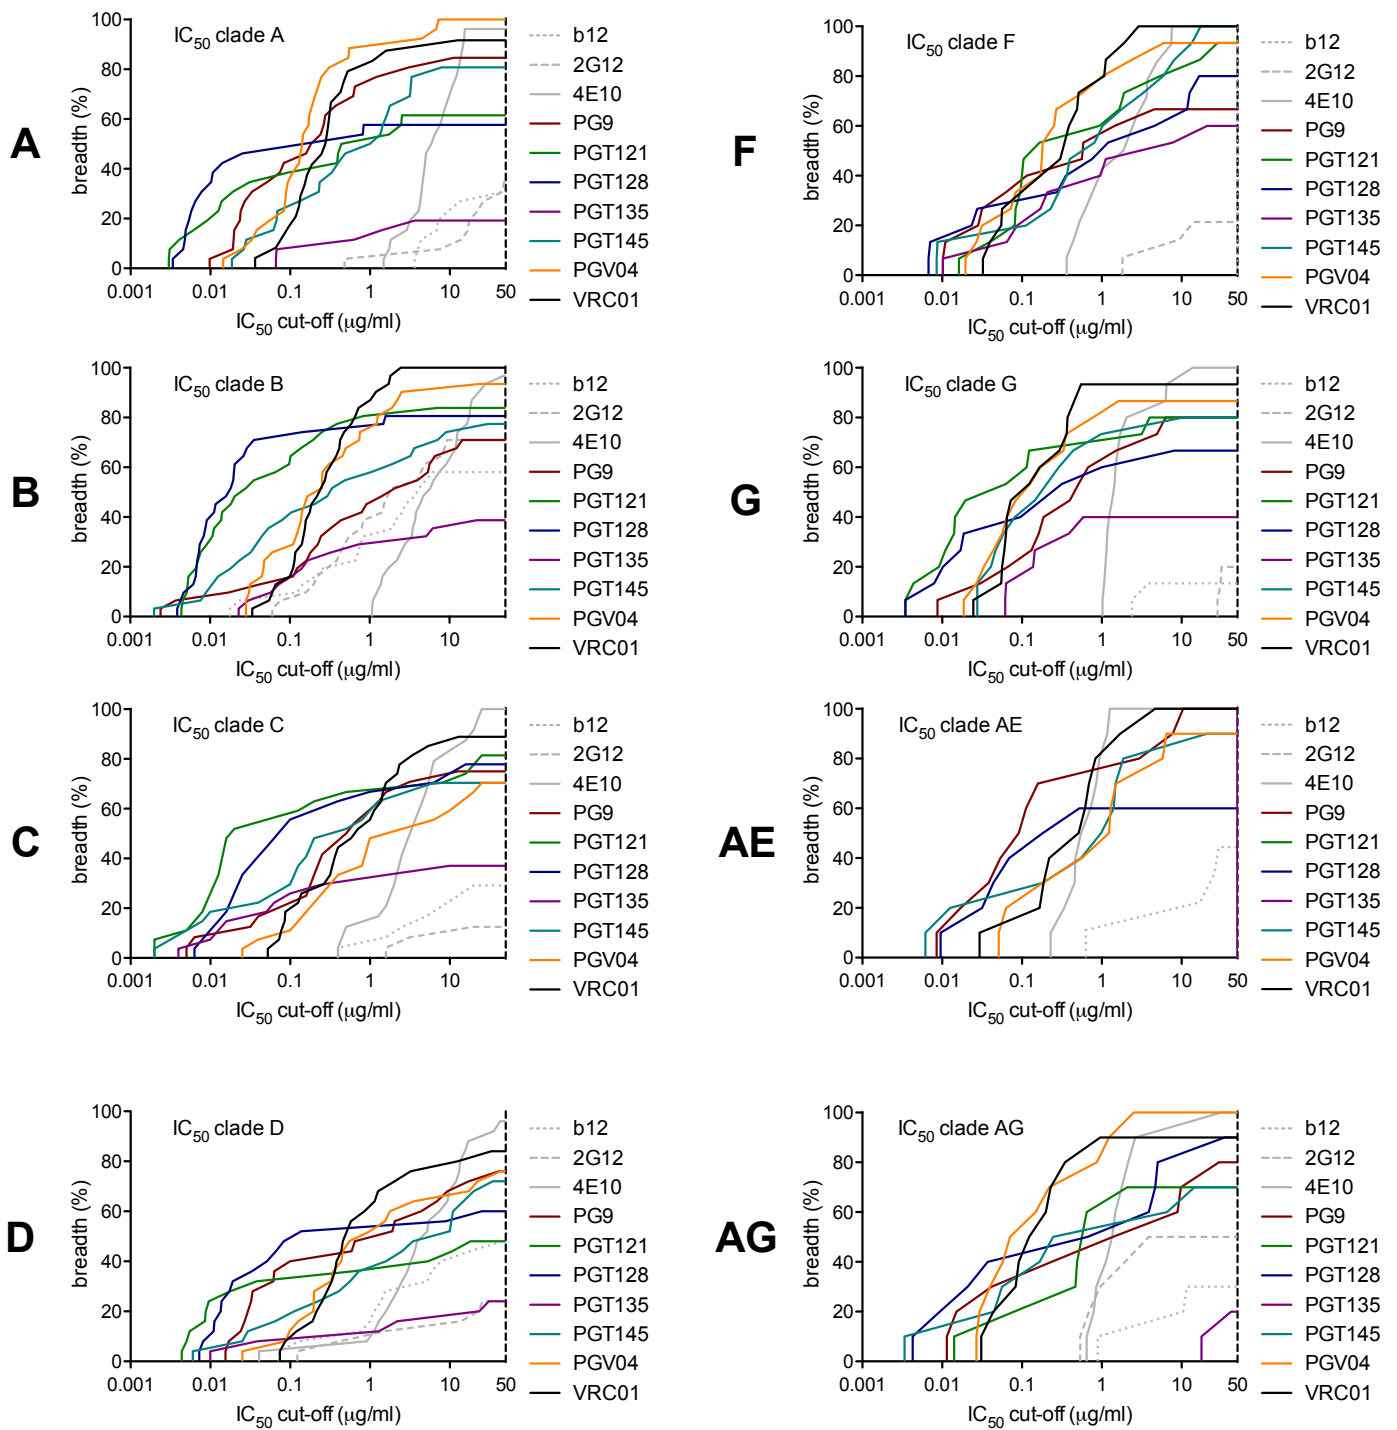

**Supplementary Figure 2.** Analysis of neutralization activity by virus clades. Cumulative frequency distribution of IC<sub>50</sub> values of broadly neutralizing MAbs tested against a 162 virus panel separated by clades A, B, C, D, F, G, AE and AG.

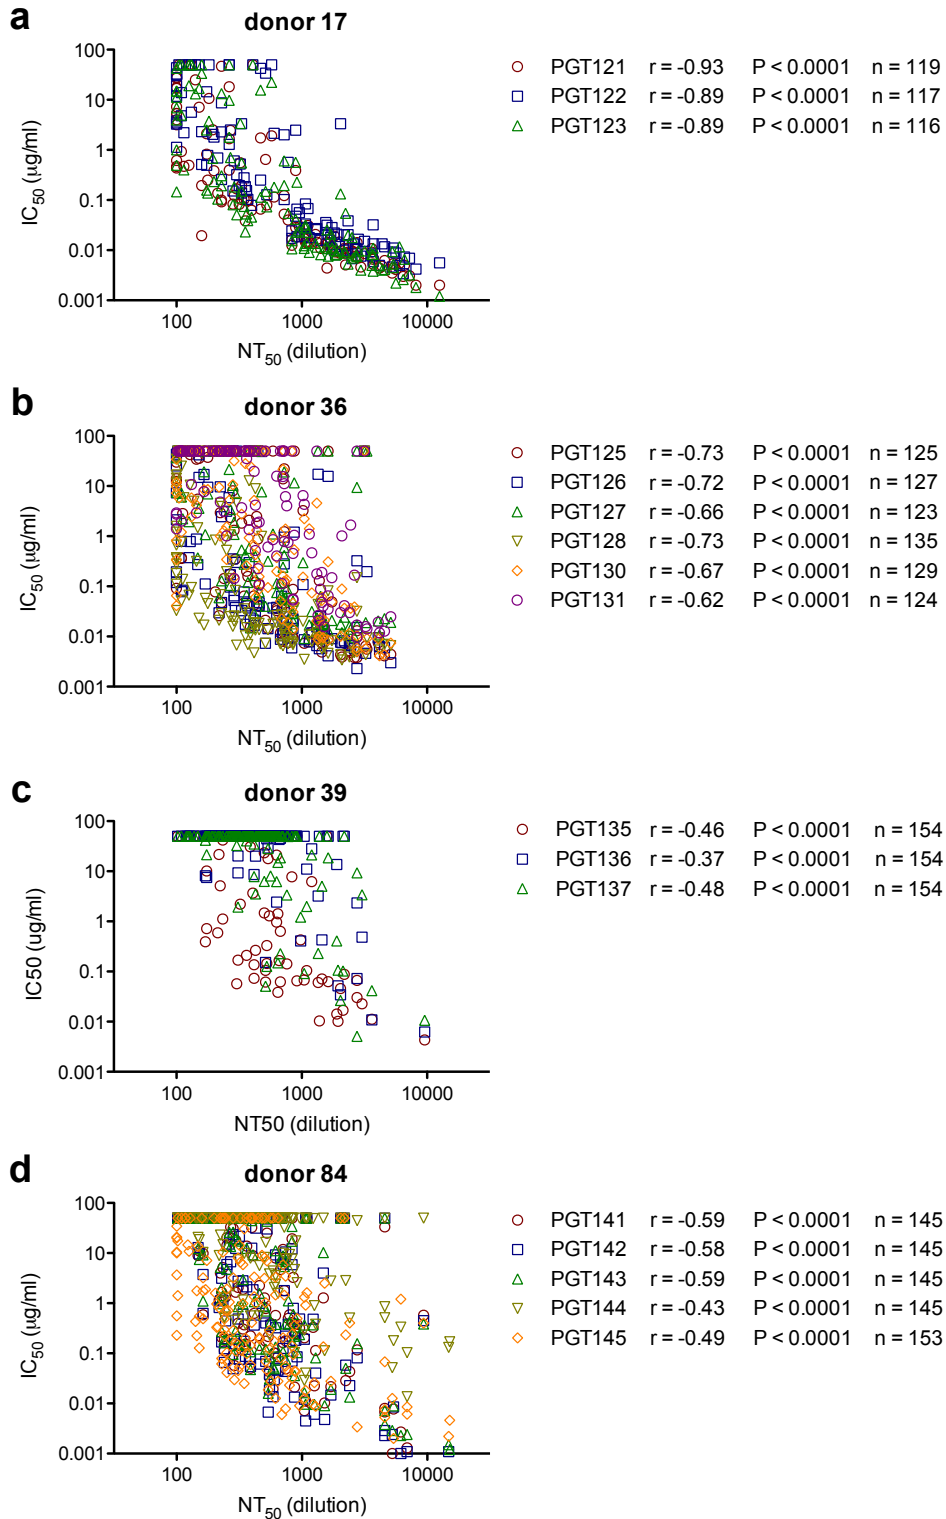

**Supplementary Figure 3.** MAb neutralization correlates strongly with serum neutralization. Correlation of  $IC_{50}$ s of the MAbs and serum  $NT_{50}$ s of the corresponding donors 17 (a), 36 (b), 39 (c) and 84 (d) is shown. Spearman correlation was used for statistical analyses. Only viruses neutralized by either the MAb ( $IC_{50} < 50 \mu\text{g/ml}$ ) or the serum ( $NT_{50} > 100$ ) were included.

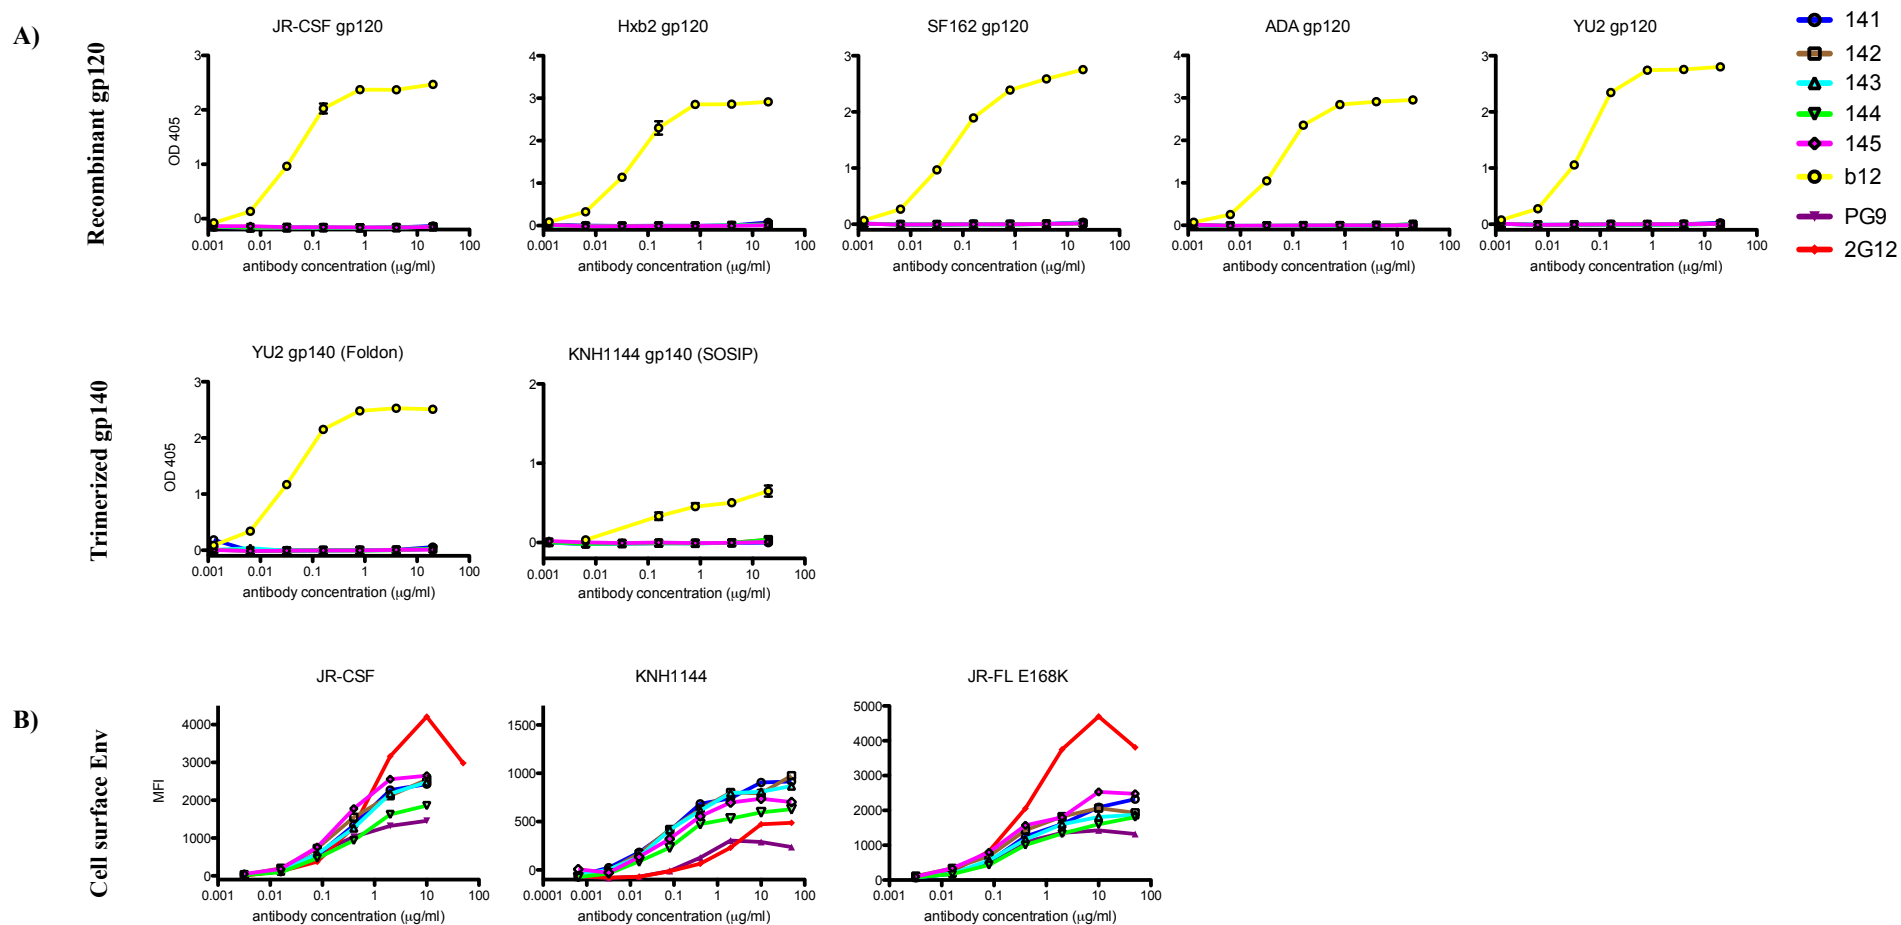

**Supplementary Figure 4. PGT 141-145 bind preferentially to cell-surface expressed trimers.** A) Binding of PGTs 141-145 to monomeric gp120 and artificially trimerized gp140 constructs as determined by ELISA. The bNAbs b12 and PG9 are included for comparison. OD, optical density (absorbance at 450 nm). B) Binding of PGTs 141-145 to Env expressed on the surface of 293T cells as determined by flow cytometry. The bNAbs 2G12 and PG9 are included for comparison.

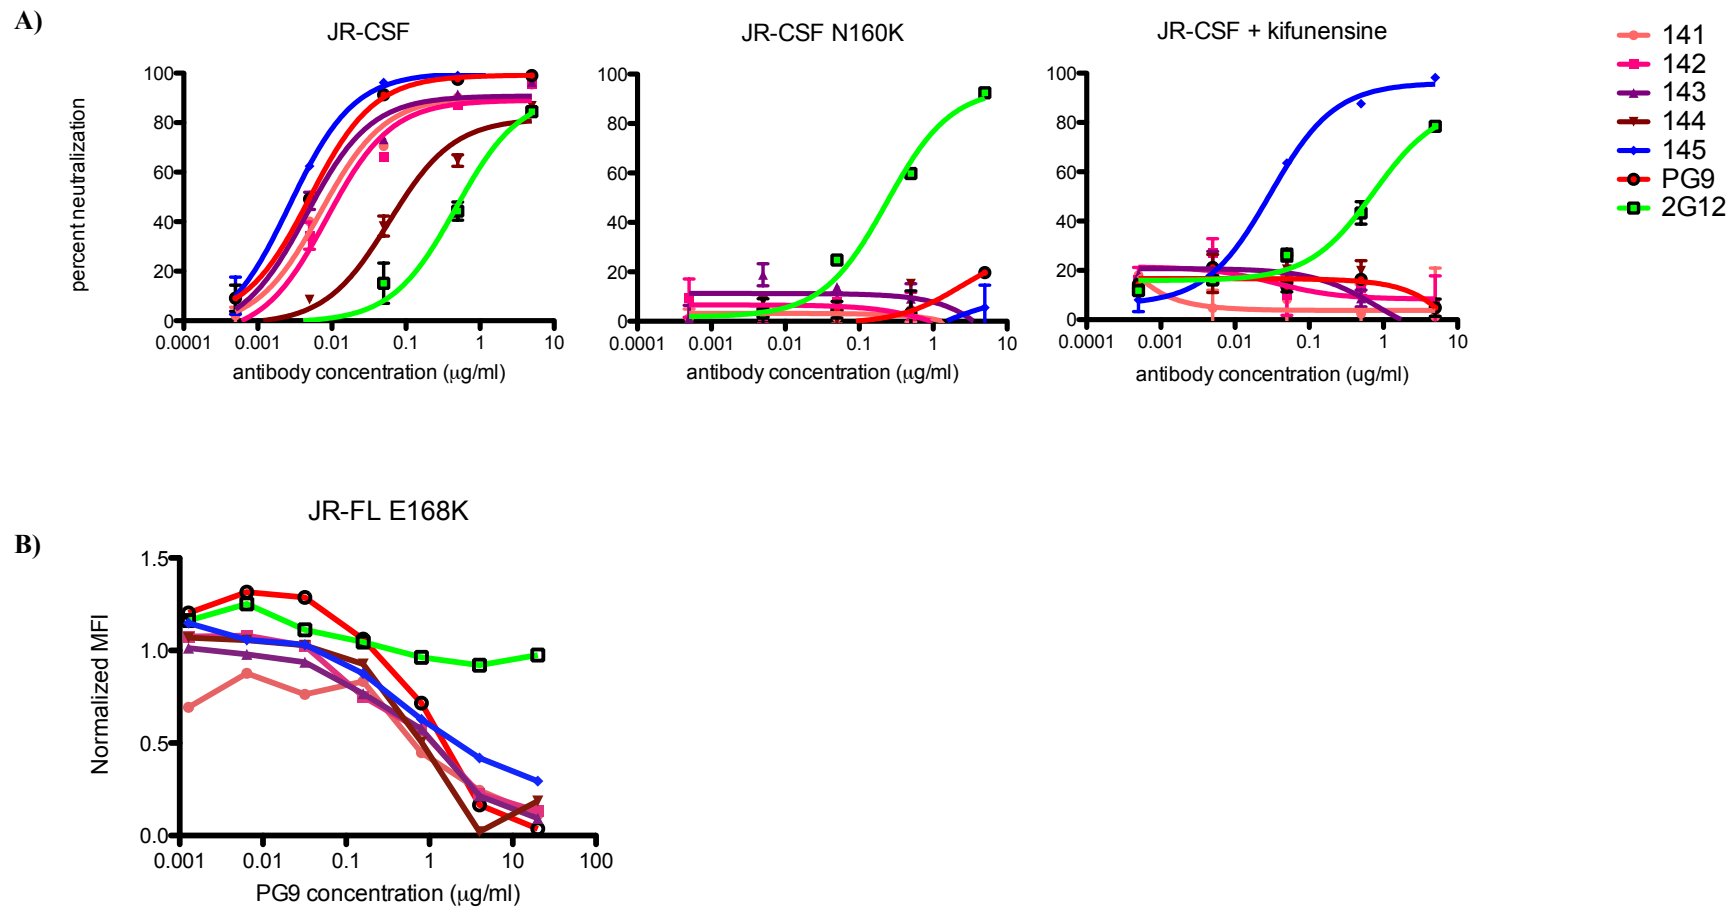

**Supplementary Figure 5. PGT mAbs 141-145 bind to epitopes overlapping those of PG9 and PG16. A)** PGTs 141-145 are sensitive to the N160K mutation and PGTs 141-144 fail to neutralize pseudoviruses produced in the presence of kifunensine. The bNAbs 2G12 was also included for comparison. **B)** PG9 competes with PGTs 141-145 for binding to cell-surface trimers. The bNAbs 2G12 was included as a negative control.



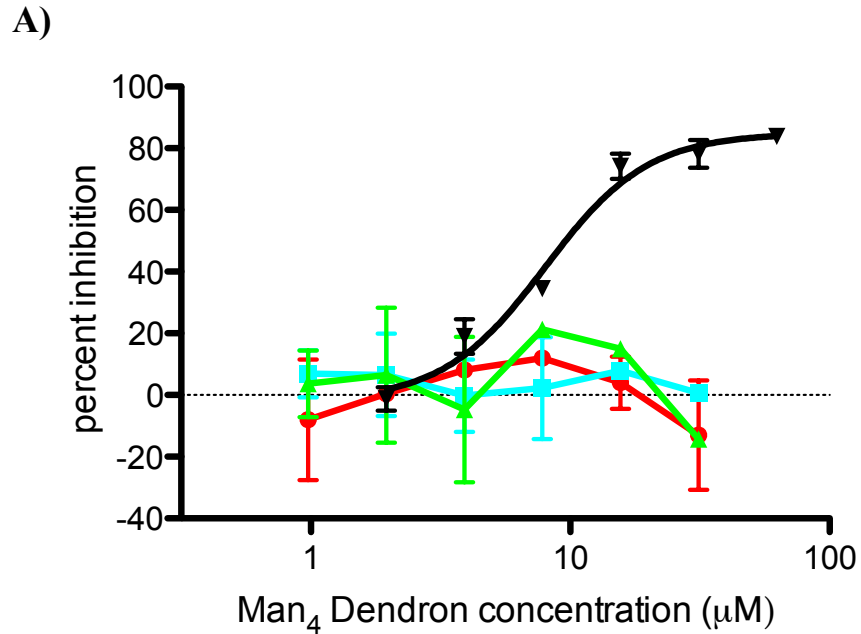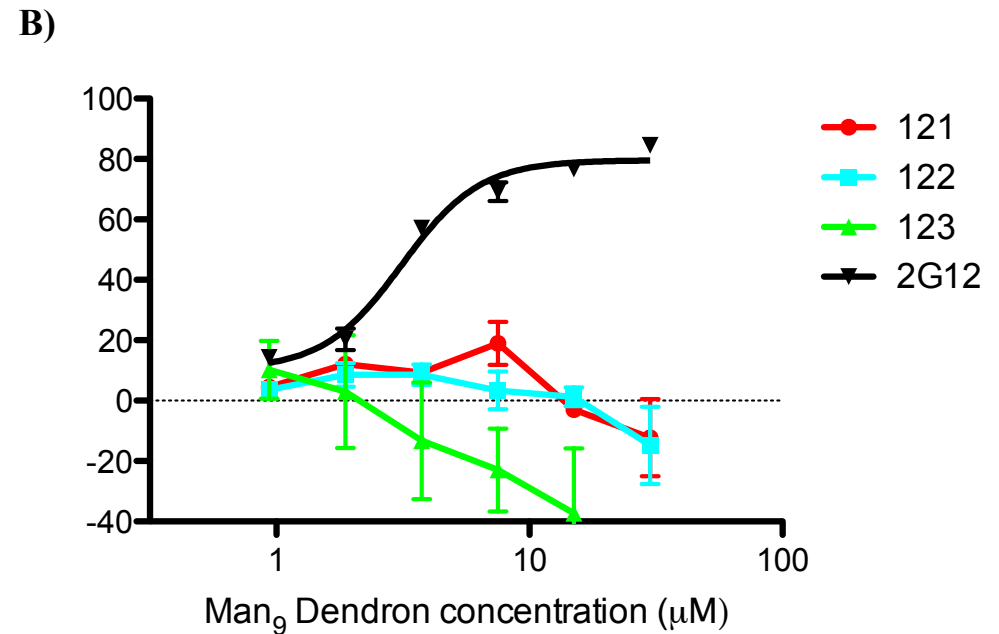

**Supplementary Figure 6. PGTs 121, 122 and 123 competition with oligodendrons.** Unlike PGTs 125, 126, 127, 128 and 130, the binding of PGTs 121, 122 and 123 to gp120 could not be competed by A) Man<sub>4</sub> or B) Man<sub>9</sub> dendrons.

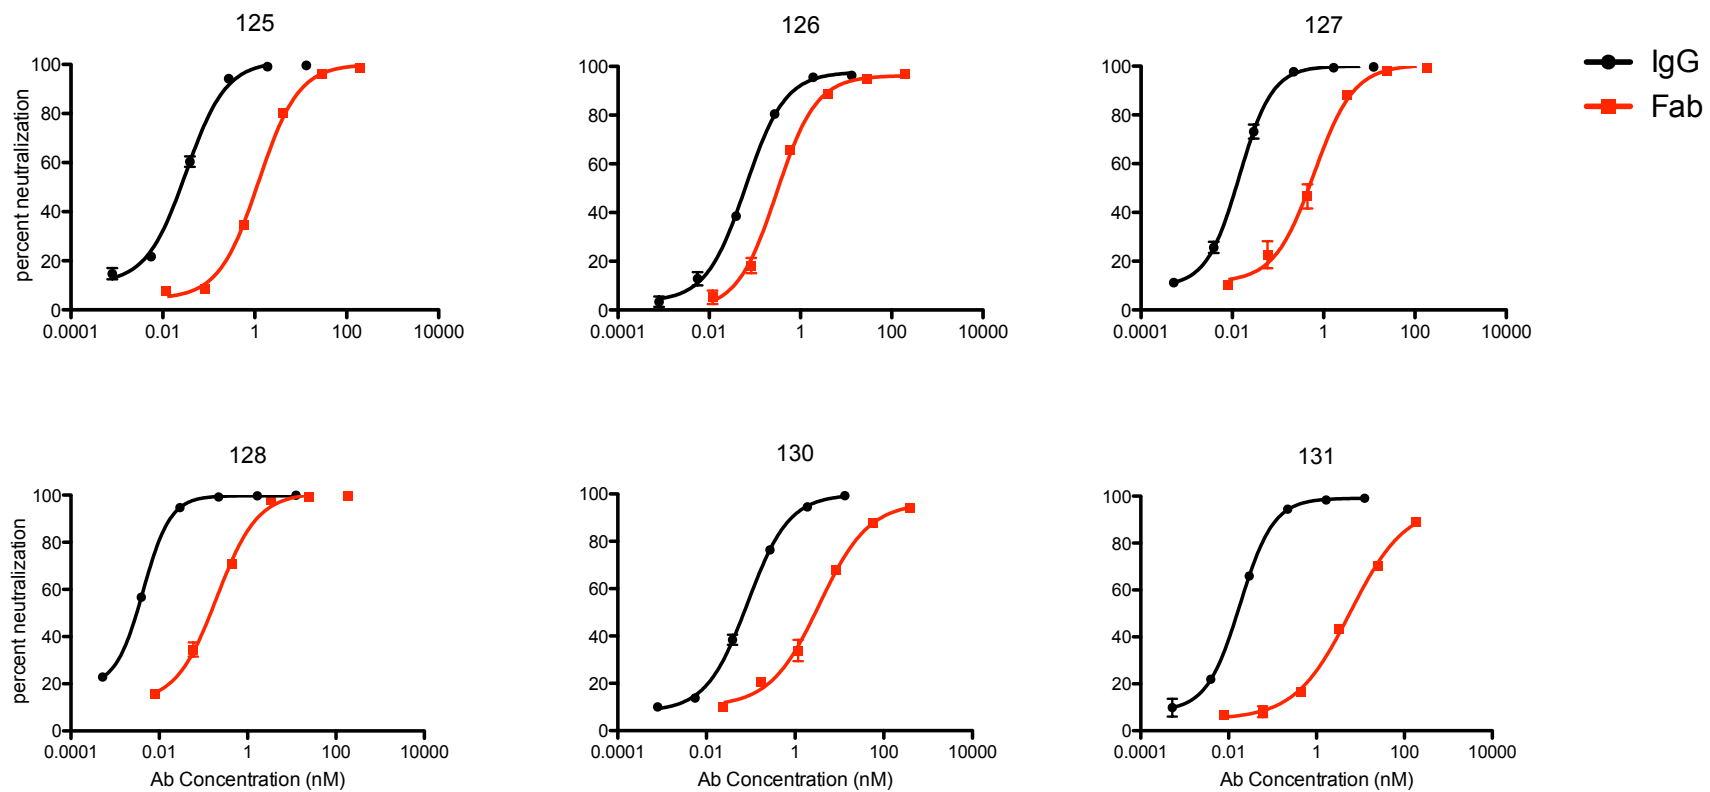

**Supplementary Figure 7. Neutralization activity of Fab fragments.** Fab fragments of PGTs-125, 126, 127, 128, 130 and 131 were generated by Lys-C digestion and the neutralizing activity tested against HIV-1<sub>JR-CSF</sub> using a single round of replication pseudovirus assay.

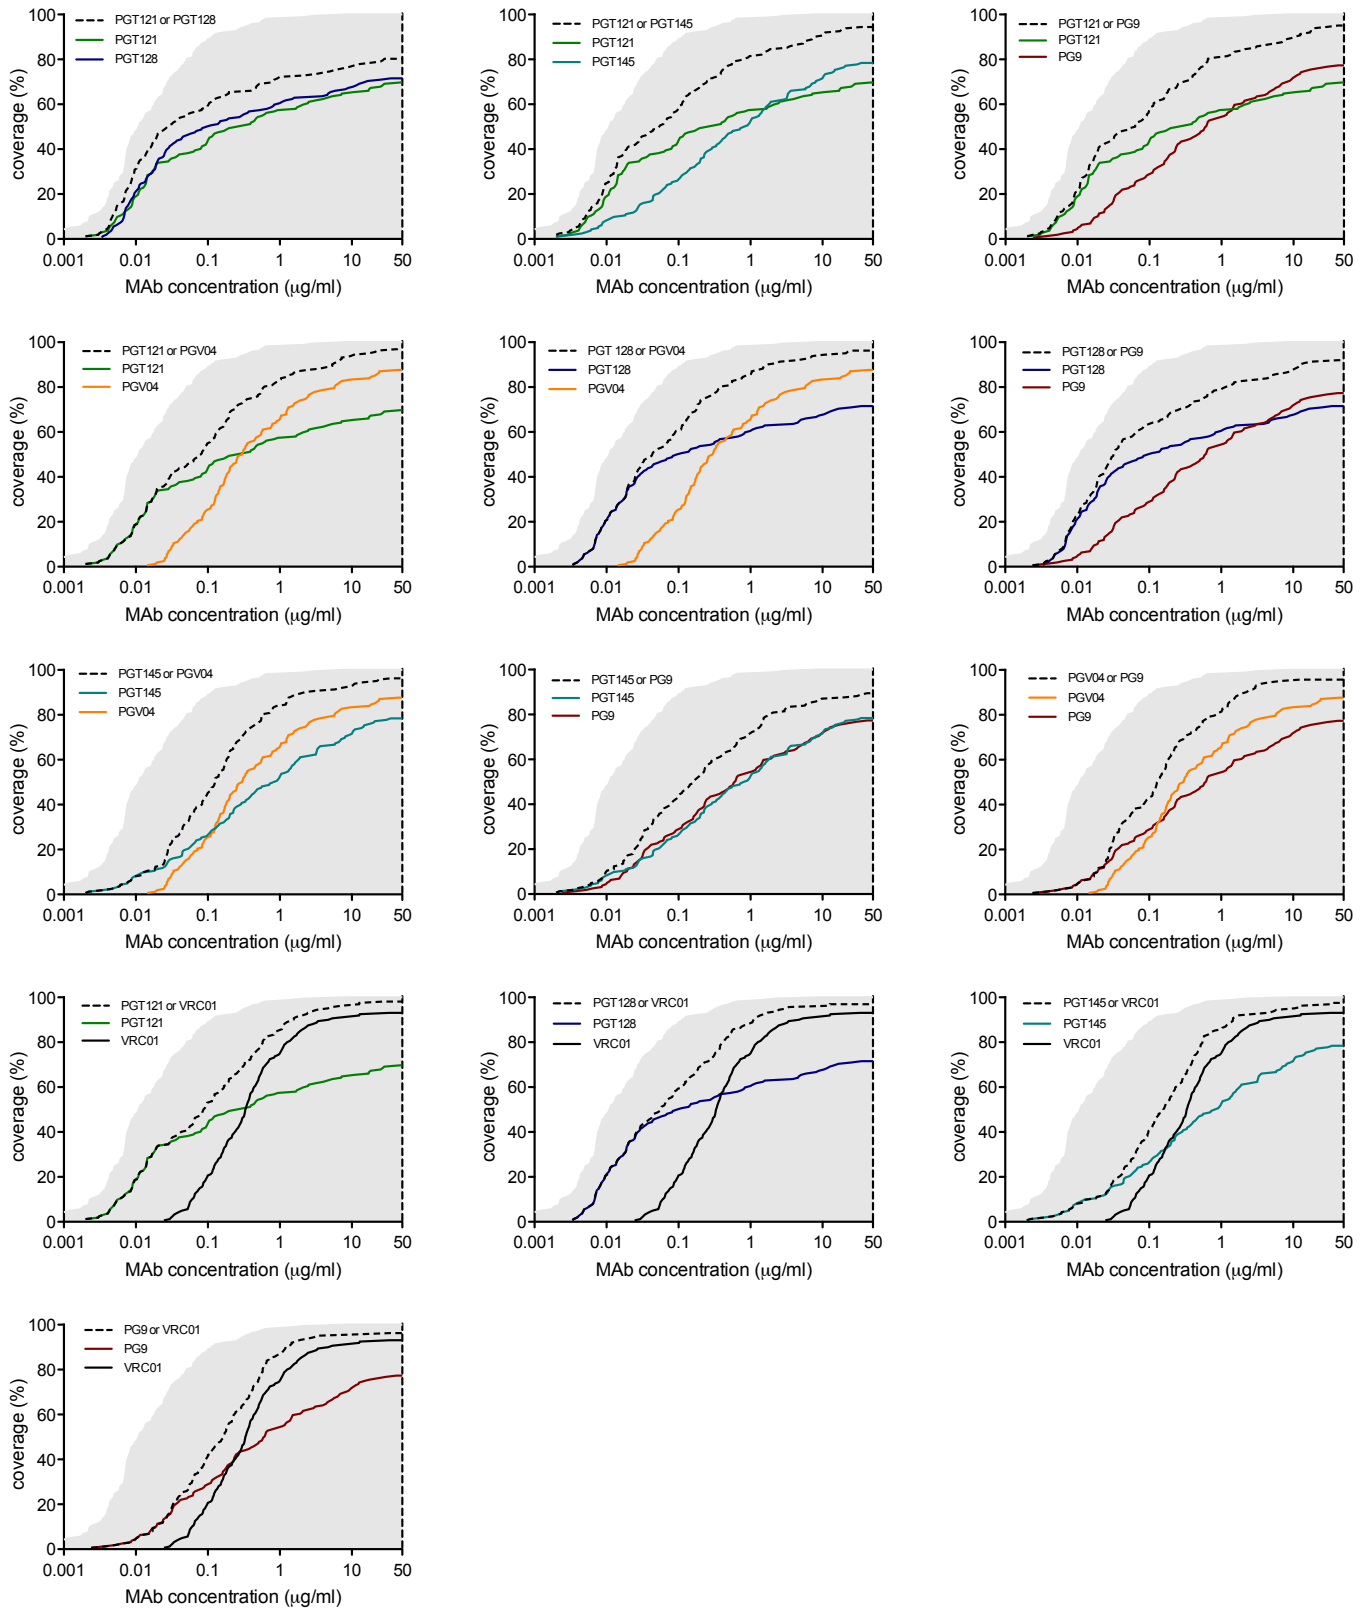

**Supplementary Figure 8.** Percent viruses covered by single MAbs (solid lines) or by at least one of the MAbs in dual combinations (dashed black lines) dependent on individual concentrations. The grey area in all panels is the coverage of 26 MAbs tested on the 162-virus panel (PGT121-123, PGT125-128, PGT130-131, PGT135-137, PGT141-145, PG9, PG16, PGC14, VRC01, PGV04, b12, 2G12, 4E10, 2F5) and depicts the theoretical maximal achievable coverage known to date.

## **Supporting Notes**

**Protocol G Principal Investigators and Institutions:** G. Miiro and J. Serwanga (MRC/UVRI Uganda Research Unit on AIDS, Uganda Virus Research Institute, Entebbe, Uganda), A. Pozniak (St Stephens AIDS Trust, Chelsea and Westminster NHS Foundation Trust, London UK), D. McPhee (NRL, St Vincent's Institute, Melbourne, Victoria, Australia), O. Manigart and L. Mwananyanda (Zambia Emory HIV Research Project, Lusaka, Zambia and the Rwanda-Zambia HIV Research Group, Emory University, Atlanta, GA, USA), E. Karita (Projet San Francisco, Kigali, Rwanda and the Rwanda-Zambia HIV Research Group, Emory University, Atlanta, GA, USA), A. Inwoley (CeDReS/CHU Treichville, Abidjan, Côte d'Ivoire), W. Jaoko (Kenya AIDS Vaccine Initiative, College of Health Sciences, University of Nairobi, Nairobi, Kenya), J. DeHovitz (SUNY Downstate Medical Center, Brooklyn, NY, USA), L.G. Bekker (Desmond Tutu HIV Centre, University of Cape Town, Cape Town, South Africa), P. Pitisuttithum (Faculty of Tropical Medicine, Mahidol University, Bangkok, Thailand), R. Paris (Dept. of Retrovirology, Armed Forces Research Institute of Medical Sciences, Bangkok, Thailand), and S. Allen (Rwanda-Zambia HIV Research Group, Emory University, Atlanta, GA, USA).
